# **CD47 suppresses phagocytosis by repositioning SIRPA and preventing integrin activation**

Meghan A. Morrissey<sup>1,2</sup> and Ronald D. Vale<sup>1,2\*</sup>.

<sup>1</sup>Department of Cellular and Molecular Pharmacology, University of California San Francisco, San Francisco, CA 94158

<sup>2</sup>Howard Hughes Medical Institute, University of California San Francisco, San Francisco, CA 94158

\*Corresponding Author

## 1 **Summary**

2

3 Macrophages must engulf dead cells, debris, and pathogens, while selecting against  
4 healthy cells to prevent autoimmunity. Healthy cells express CD47 on their surface,  
5 which activates the SIRPA receptor on macrophages to suppress engulfment. Cancer  
6 cells overexpress CD47 to evade clearance by the innate immune system, making the  
7 CD47-SIRPA signaling axis an appealing therapeutic target. However, the mechanism  
8 by which CD47-SIRPA inhibits engulfment remains poorly understood. Here, we dissect  
9 SIRPA signaling using a reconstituted target with varying concentrations of activating  
10 and inhibitor ligands. We find that SIRPA is excluded from the phagocytic synapse  
11 between the macrophage and its target unless CD47 is present. Artificially directing  
12 SIRPA to the kinase-rich synapse in the absence of CD47 activates SIRPA and  
13 suppresses engulfment, indicating that the localization of the receptor is critical for  
14 inhibitory signaling. CD47-SIRPA inhibits integrin activation in the macrophage,  
15 reducing macrophage-target contact and suppressing phagocytosis. Chemical  
16 activation of integrins can override this effect and drive engulfment of CD47-positive  
17 targets, including cancer cells. These results suggest new strategies for overcoming  
18 CD47-SIRPA inhibition of phagocytosis with potential applications in cancer  
19 immunotherapy.

## 20 **Introduction**

21  
22 The innate immune system is finely balanced to rapidly activate in response to  
23 pathogenic stimuli, but remain quiescent in healthy tissue. Macrophages, key effectors  
24 of the innate immune system, measure activating and inhibitory signals to set a  
25 threshold for engulfment and cytokine secretion. The cell surface protein CD47 is a  
26 “Don’t Eat Me” signal that protects healthy cells from macrophage engulfment and is  
27 often upregulated by cancer cells to evade innate immune detection (Chao et al., 2012;  
28 Jaiswal et al., 2009; Majeti et al., 2009; Oldenborg et al., 2001, 2000). CD47 function-  
29 blocking antibodies result in decreased cancer growth or tumor elimination (Advani et  
30 al., 2018; Chao et al., 2010a; Gholamin et al., 2017; Jaiswal et al., 2009; Willingham et  
31 al., 2012). Despite the therapeutic promise of manipulating CD47 signaling, the  
32 mechanism by which CD47 suppresses macrophage signaling is unclear.

33  
34 CD47 on the surface of cancer cells binds to SIRPA in macrophages or dendritic cells to  
35 prevent activation (Jiang et al., 1999; Liu et al., 2015; Okazawa et al., 2005; Seiffert et  
36 al., 1999; Tseng et al., 2013; Yi et al., 2015). Activation of the inhibitory receptor SIRPA  
37 must be controlled with high fidelity to suppress engulfment of viable cells when CD47 is  
38 present while allowing for robust engulfment of targets lacking CD47. CD47 binding  
39 triggers SIRPA phosphorylation by Src family kinases (Barclay and Brown, 2006), but  
40 how CD47 binding is translated across the cell membrane to drive SIRPA  
41 phosphorylation is not known. Activated SIRPA recruits the phosphatases SHP-1 and  
42 SHP-2 (Fujioka et al., 1996; Noguchi et al., 1996; Okazawa et al., 2005; Oldenborg et  
43 al., 2001; Veillette et al., 1998). The downstream events that shut off the engulfment  
44 program are not clear.

45  
46 In vivo, CD47 has been reported to suppress multiple different pro-engulfment “Eat Me”  
47 signals, including IgG, complement and calreticulin (Chen et al., 2017; Gardai et al.,  
48 2005; Oldenborg et al., 2001). This complexity, in addition to substantial variation in  
49 target size, shape and concentration of “Eat Me” signals, can make a quantitative,  
50 biochemical understanding of receptor activation difficult. To overcome this problem, we

51 utilize a synthetic target cell-mimic with a defined complement of signals to interrogate  
52 the mechanism of SIRPA activation and its downstream targets. We find that CD47  
53 ligation alters SIRPA localization, positioning SIRPA for activation at the phagocytic  
54 synapse. At the phagocytic synapse, SIRPA inhibits integrin activation to limit  
55 macrophage spreading across the surface of the engulfment target. Directly activating  
56 integrin eliminated the effect of CD47 and rescued engulfment. Activation of integrin  
57 also allowed macrophages to engulf cancer cells, similar to the effect observed with a  
58 CD47 function-blocking antibody.

## 59 **Results**

60

### 61 **CD47-SIRPA signaling suppresses IgG and phosphatidylserine “Eat Me” signals**

62

63 To study the mechanism of “Eat Me” and “Don’t Eat Me” signal integration during  
64 engulfment, we used a reconstituted engulfment target (Figure 1A). Silica beads were  
65 coated in a supported lipid bilayer to mimic the surface of a cancer cell. To activate  
66 engulfment, we introduced IgG, a well-defined “Eat Me” signal that synergizes with  
67 CD47 blockade to promote cancer cell clearance (Chao et al., 2010a; Freeman and  
68 Grinstein, 2014). IgG is recognized by the Fc  $\gamma$  Receptor family (FcR), which activates  
69 downstream signaling and engulfment (Freeman and Grinstein, 2014). To activate  
70 SIRPA, we incorporated the CD47 extracellular domain at a surface density selected to  
71 mimic the CD47 density on cancer cells ( $\sim 600$  molecules/ $\mu\text{m}^2$ , Figure S1).

72

73 Using this system, we tested the effect of CD47 on engulfment across a titration of IgG  
74 densities (Figure S1). We mixed beads with the macrophage-like cell line RAW264.7  
75 and measured the number of internalized beads by confocal microscopy. We found that  
76 CD47-SIRPA signaling suppressed engulfment at intermediate IgG densities, but did  
77 not appreciably affect engulfment of targets with high densities of bound IgG (Figure 1B-  
78 D). This suppression was dependent on CD47 binding as a mutated CD47 extracellular  
79 domain (F37D, T115K) that is unable to bind to SIRPA (Hatherley et al., 2008) was also  
80 unable to suppress engulfment.

81

82 We further examined whether CD47-SIRPA signaling could suppress engulfment of  
83 targets mimicking apoptotic corpses. A critical “Eat Me” signal from apoptotic corpses is  
84 phosphatidylserine, which becomes exposed on the outer leaflet of the plasma  
85 membrane during cell stress, apoptosis (Fadok et al., 1992; Poon et al., 2014), and on  
86 some cancer cells (Birge et al., 2016; Utsugi et al., 1991). We found that engulfment of  
87 beads containing 10% phosphatidylserine in the supported lipid bilayer was inhibited by  
88 the inclusion of CD47 on the bilayer (Figure 1E, Figure S1). Together, these data show  
89 that CD47-SIRPA signaling can block engulfment driven by IgG and phosphatidylserine.

90 Thus, bilayer-coated beads provide a well-defined and tunable platform for studying the  
91 integration of “Eat Me” and “Don’t Eat Me” signals during engulfment.

92

### 93 **CD47 ligation relocates SIRPA to the phagocytic synapse**

94

95 We next sought to determine the mechanism by which CD47 ligation regulates SIRPA  
96 activity. We first examined SIRPA localization during phagocytosis of IgG-coated beads.  
97 In the absence of CD47, SIRPA was segregated away from the phagocytic cup that  
98 enveloped IgG-coated beads (Figure 2A). Similarly, SIRPA was depleted at the center  
99 of the immunological synapse between a macrophage and a supported lipid bilayer  
100 containing phosphatidylserine (Figure S2). In contrast, in the presence of CD47, SIRPA  
101 remained at the phagocytic cup (Figure 2A). These data demonstrate that CD47 recruits  
102 SIRPA to the phagocytic synapse.

103

104 We next sought to address the mechanism of SIRPA segregation away from the  
105 phagocytic cup in the presence of IgG and absence of CD47. We hypothesized that  
106 exclusion of unligated SIRPA from the synapse could be driven by its heavily  
107 glycosylated extracellular domain, either by interactions with the surrounding glycocalyx  
108 or steric exclusion from the spatially restricted phagocytic synapse. We therefore  
109 created a SIRPA chimeric receptor where the extracellular domain was replaced with a  
110 small, inert protein domain (FRB<sup>ext</sup>-SIRPA; Figure 2B). Unlike full length SIRPA, FRB<sup>ext</sup>-  
111 SIRPA was not segregated away from the cell-target synapse (Figure 2C, D). This  
112 result demonstrates that the extracellular domain of SIRPA is required for SIRPA  
113 exclusion from the phagocytic cup.

114

### 115 **Targeting SIRPA to the phagocytic synapse suppresses engulfment**

116

117 Receptor activation by Src family kinases at the phagocytic cup is favored due to  
118 exclusion of bulky phosphatases like CD45 (Freeman et al., 2016; Goodridge et al.,  
119 2011). We therefore hypothesized that positioning SIRPA at the phagocytic cup may  
120 drive receptor activation. To distinguish between the effects of CD47 binding and

121 synapse localization, we developed a chimeric SIRPA receptor that localized to the  
122 phagocytic synapse in the absence of CD47. We replaced the SIRPA extracellular  
123 domain with the IgG-binding extracellular domain of the Fc $\gamma$ RI  $\alpha$  chain (Figure 2B;  
124 termed FcR1<sup>ext</sup>-SIRPA<sup>int</sup>). This receptor is driven into the synapse by IgG binding  
125 instead of CD47 (Figure 2C, D). Expression of this synapse-localized chimera  
126 suppressed engulfment of IgG-coated beads in the absence of CD47 (Figure 2E, Figure  
127 S2). Thus, targeting SIRPA to the phagocytic cup is sufficient to inhibit engulfment, even  
128 in the absence of its natural ligand CD47.

129  
130 As an alternative strategy to control the localization of SIRPA activity, we used a  
131 chemically inducible dimerization system (Spencer et al., 1993). We fused one half of  
132 the chemically inducible dimer to FcR (FcR  $\gamma$  chain-FKBP) and the second to a soluble  
133 SIRPA intracellular domain (FRB-SIRPA<sup>int</sup>, Figure 2F). In the presence of the small  
134 molecule rapamycin, FKBP and FRB form a high-affinity dimer (Spencer et al., 1993),  
135 thereby recruiting the SIRPA intracellular domain to FcR. In the absence of rapamycin,  
136 cells efficiently engulfed IgG-coated beads (Figure 2F, Figure S2). In contrast,  
137 rapamycin-induced recruitment of the SIRPA intracellular domain to the FcR  $\gamma$  chain  
138 significantly suppressed engulfment (Figure 2F).

139  
140 We next examined the extracellular domain truncation of SIRPA (FRB<sup>ext</sup>-SIRPA) that  
141 was not excluded from the phagocytic synapse (Figure 2B). FRB<sup>ext</sup>-SIRPA constitutively  
142 suppressed engulfment (Figure 2G), demonstrating that exclusion of SIRPA is essential  
143 for efficient engulfment. Taken together, these experiments show that CD47 activates  
144 SIRPA by recruiting it to the phagocytic synapse.

### 145 146 **FcR phosphorylation is not a major target of CD47-SIRPA signaling**

147  
148 We next sought to determine how activated SIRPA inhibits engulfment. Phosphorylated  
149 SIRPA recruits the phosphatases SHP-1 and SHP-2 via their phosphobinding SH2  
150 domains but the downstream targets of SHP-1 and SHP-2 are not known (Fujioka et al.,  
151 1996; Noguchi et al., 1996; Okazawa et al., 2005; Oldenborg et al., 2001; Veillette et al.,

152 1998). One potential target of SIRPA-bound SHP phosphatases is FcR itself. When  
153 encountering an IgG-bound bilayer, macrophages clustered IgG into mobile  
154 microclusters (Figure 3, Movie S1) that recruited Syk (Figures S3 (Lin et al., 2016)).  
155 When CD47 was present, these microclusters still formed and recruited Syk, suggesting  
156 that FcR is still phosphorylated (Figures 3A and S3, Movie S2). Further, when we  
157 looked at SIRPA localization at the cell-target interface at high resolution, we found that,  
158 even in the presence of CD47, SIRPA did not co-localize with FcR clusters, suggesting  
159 that SIRPA is not positioned to dampen receptor activation (Figure S3). Overall, this  
160 suggests that changes to FcR activation and Syk recruitment are unlikely to account for  
161 the effect of SIRPA, consistent with previous biochemical observations (Okazawa et al.,  
162 2005; Tsai and Discher, 2008).

163

#### 164 **CD47 prevents integrin activation**

165

166 During our TIRF experiments, we observed a difference in the spreading of cells on  
167 bilayers containing IgG alone versus IgG plus CD47. On IgG-coated bilayers, cells  
168 rapidly spread across the bilayer surface (Figure 3A, Movie S1). In contrast,  
169 macrophages encountering an IgG and CD47-containing bilayer exhibited reduced cell  
170 spreading (Figure 3A and 3B, Movie S2). These data shows that CD47 inhibits cell  
171 spreading across a target substrate.

172

173 Cell spreading is thought to involve activation of integrins and the actin cytoskeleton  
174 (Springer and Dustin, 2011). Inactive integrins exist in a low affinity, bent confirmation  
175 (Springer and Dustin, 2011). Upon activation, the extracellular domain extends into an  
176 open conformation that can bind many ligands with high affinity (Freeman and Grinstein,  
177 2014; Springer and Dustin, 2011). FcR activation stimulates inside-out activation of  
178 integrins (Dupuy and Caron, 2008; Jones et al., 1998). Activated integrins can then  
179 promote engulfment, either by increasing adhesion to the target particle or by  
180 reorganizing the actin cytoskeleton (Dupuy and Caron, 2008; Wong et al., 2016). We  
181 found that inhibiting integrin with a  $\beta 2$  integrin function-blocking antibody (2E6) or Fab



182 dramatically decreased engulfment efficiency (Figure 3C and S3), demonstrating that  
183 inactivating integrins is sufficient to suppress engulfment.

184

185 Because integrin is required for cell spreading and engulfment (Springer and Dustin,  
186 2011), we hypothesized that CD47-SIRPA signaling may inhibit engulfment by  
187 preventing inside-out activation of integrin. Supporting this hypothesis, a previous study  
188 identified phosphopaxillin, which is specifically recruited to sites of integrin activation, as  
189 one of a number of phosphoproteins affected by CD47 (Geiger et al., 2009; Tsai and  
190 Discher, 2008). We found that the enrichment of phospho-paxillin at the interface of the  
191 macrophage with an IgG-coated bead was substantially diminished by the simultaneous  
192 presence of CD47 on the bead (Figure 3D). Together, these data indicate that CD47-  
193 SIRPA signaling prevents integrin activation.

194

#### 195 **Activating integrin bypasses CD47-SIRPA inhibitory signaling**

196

197 CD47-SIRPA has previously been reported to affect paxillin and myosin  
198 phosphorylation, as well as F-actin recruitment (Tsai and Discher, 2008). It is not clear  
199 which of these is a target of CD47 signaling and which is a secondary effect of altered  
200 upstream signaling (Tsai and Discher, 2008). We hypothesized that if SIRPA signaling  
201 suppresses engulfment primarily by inhibiting integrin inside-out activation, then directly  
202 activating integrin might bypass SIRPA-mediated inhibition and permit bead engulfment  
203 (Figure 4A). Alternatively, if the target of CD47-SIRPA signaling is in a parallel pathway  
204 or downstream of integrin activation, then activating integrin should not rescue  
205 engulfment following SIRPA activation. To activate integrin, we treated macrophages  
206 with manganese, which locks integrin into a high-affinity open conformation (Dransfield  
207 et al., 1992). We found that macrophages treated with 1 mM manganese engulfed  
208 beads with a similar efficiency whether or not CD47 was conjugated to the supported  
209 lipid bilayer (Figure 4B). Importantly, manganese did not trigger bead engulfment on its  
210 own or dramatically enhance engulfment of IgG-coated beads in the absence of CD47  
211 (Figure 4B,C), establishing that increasing integrin activation is not sufficient to trigger

212 engulfment. Thus, a manganese-induced increase in engulfment was specific to beads  
213 coated with CD47 and IgG.

214

215 As an alternative strategy to activate integrins, we incubated macrophages with beads  
216 containing a surplus of high affinity integrin ligand, ICAM-1 (Springer and Dustin, 2011).  
217 ICAM-1 was sufficient to activate integrin and recruit phosphatidylinositol even in the  
218 presence of CD47 (Figure 4D). Inclusion of high concentrations of ICAM-1 abrogated  
219 the inhibitory effect of CD47 on phagocytosis, but did not dramatically alter the  
220 engulfment efficiency of IgG coated beads in the absence of CD47 (Figure 4E).

221

222 CD47 has previously been reported to inhibit downstream steps in the phagocytic  
223 signaling pathway, including actin accumulation at the phagocytic cup (Tsai and  
224 Discher, 2008). Despite the presence of CD47, ICAM-1-bound beads had similar levels  
225 of actin accumulation as beads lacking CD47 (Figure 4F). This demonstrates that  
226 activating integrins reactivates downstream signaling in the presence of CD47.  
227 Together, these data suggest that inside-out activation of integrin is the primary target of  
228 CD47-SIRPA signaling.

229

### 230 **Integrin activation drives cancer cell engulfment**

231

232 Many cancer cells overexpress CD47 to evade the innate immune system despite  
233 increased expression of “Eat Me” signals such as calreticulin or phosphatidylserine  
234 (Birge et al., 2016; Chao et al., 2010b; Gardai et al., 2005; Utsugi et al., 1991). Blocking  
235 CD47 with a therapeutic antibody allows “Eat Me” signals to dominate, resulting in  
236 engulfment of whole cancer cells (Jaiswal et al., 2009; Majeti et al., 2009). We  
237 hypothesized that exogenous activation of integrin would bypass the CD47 signal on the  
238 surface of cancer cells, allowing for engulfment. To test this, we incubated bone marrow  
239 derived mouse macrophages with a CD47-positive murine leukemia line, L1210 (Chen  
240 et al., 2017). We found that activating integrins with 100  $\mu$ M manganese increased the  
241 ability of macrophages to engulf cancer cells, reaching a similar efficiency as treatment  
242 with a CD47 function-blocking antibody (Figure 4G,H; Movie S3). Manganese did not

243 directly affect cancer cell viability over the time course of this experiment (Figure S4).  
244 This data shows that activating integrins bypasses the suppressive CD47 signal on the  
245 surface of cancer cells.

## 246 **Discussion**

247

248 CD47-SIRPA signaling suppresses engulfment, protecting viable cells and allowing  
249 cancer cells to evade the innate immune system (Jaiswal et al., 2009; Majeti et al.,  
250 2009; Oldenborg et al., 2000). Although CD47 blockade is a promising new target for  
251 cancer therapies (Advani et al., 2018; Gholamin et al., 2017; Willingham et al., 2012),  
252 the mechanism of CD47-SIRPA signaling has not been clarified. We demonstrate that  
253 localizing SIRPA to the phagocytic synapse is sufficient to activate this inhibitory  
254 receptor. Once active, SIRPA suppresses engulfment by preventing integrin activation  
255 (Figure 4I).

256

257 Our results demonstrate that SIRPA localization is a key determinant of its activity. In  
258 the absence of CD47, SIRPA is relegated to the phosphatase-rich zone outside the cell  
259 bead interface (Freeman et al., 2016; Goodridge et al., 2011). This localization prevents  
260 SIRPA activation. Conversely, CD47 binding retains SIRPA at the Src-kinase rich  
261 phagocytic cup, where it is activated and suppresses engulfment. Spatial segregation of  
262 Src-family kinase activity at the central phagocytic synapse and CD45 phosphatase  
263 activity at the periphery underlies the activation of many activating receptors (TCR, Fc  
264 Receptor, (Freeman et al., 2016; James and Vale, 2012). Our work expands this model,  
265 suggesting that exclusion of inhibitory receptors like SIRPA may be a pre-requisite for  
266 efficient engulfment. Further, these data suggest a new paradigm for regulating  
267 inhibitory receptors based on conditional recruitment to the immunological synapse.

268

269 SIRPA exclusion from the phagocytic synapse in the absence of CD47 prevents basal  
270 inhibition of engulfment and allows positive signaling to dominate. This exclusion  
271 requires the extracellular domain of SIRPA, as replacing the extracellular domain with a  
272 small, inert protein (FRB) allowed SIRPA to enter the phagocytic synapse (Figure 2).  
273 CD45, the transmembrane phosphatase that negatively regulates Fc Receptor  
274 activation, is sterically excluded from the synapse between a T cell or macrophage and  
275 its target (Freeman et al., 2016; Goodridge et al., 2011; James and Vale, 2012). The  
276 SIRPA extracellular domain is predicted to be smaller than CD45 (aglycosylated

277 proteins are 12 nm and 17 nm respectively (Chang et al., 2016; Hatherley et al., 2008).  
278 Biophysical studies have shown that proteins that are the same size or slightly smaller  
279 than the height of a cell-cell synapse are excluded from the synapse due to steric  
280 constraints (Schmid et al., 2016). Ligand binding is sufficient to drive synapse  
281 localization (Schmid et al., 2016). Thus SIRPA may be sterically excluded unless CD47  
282 ligation overcomes the energetic barrier preventing SIRPA from entering the  
283 immunological synapse. Alternatively, other mechanisms, such as lateral crowding or  
284 interactions with the surrounding glycocalyx, could drive SIRPA exclusion from the  
285 synapse.

286  
287 After addressing the mechanism of SIRPA activation, we sought to identify the targets  
288 of CD47-SIRPA signaling. Previous work has shown that SIRPA activation dramatically  
289 reduces global phosphotyrosine, including phosphorylation of mDia, paxillin, talin,  
290 alpha-actinin and non-muscle myosin IIA (Okazawa et al., 2005; Tsai and Discher,  
291 2008). However, discerning between direct targets of SIRPA-bound phosphatases and  
292 indirect targets resulting from an upstream block in the engulfment signaling cascade  
293 has been challenging. Because blocking non-muscle myosin II decreases phagocytosis  
294 to a similar extent as CD47, myosin has been presumed to be the primary target of  
295 SIRPA (Chao et al., 2012; Tsai and Discher, 2008). However, we demonstrate that the  
296 inhibitory effect of CD47-SIRPA can be eliminated by re-activating integrin, suggesting  
297 that the direct targets of SIRPA-bound SHP phosphatases are upstream of integrin  
298 activation. SHP-2 has previously been shown to directly dephosphorylate Fak (Yu et al.,  
299 1998) and vinculin (Campbell et al., 2018), thus SHP-2 may act upon these key integrin  
300 regulators. However, given the broad specificity of SHP-1 and SHP-2, these  
301 phosphatases may dephosphorylate several targets at the phagocytic cup to suppress  
302 signaling.

303  
304 Our work provides new insights into the connection between SIRPA and integrins. While  
305 phosphopaxillin (Tsai and Discher, 2008), has previously been shown to be affected by  
306 CD47-SIRPA, the relative importance of integrin signaling had not previously been  
307 addressed. We show that CD47-SIRPA prevents integrin activation, allowing

308 macrophages to quickly discriminate between targets based on the presence of CD47.  
309 SIRPA overexpression has previously been shown to decrease surface levels of integrin  
310 over time (Liu et al., 2008). While this decrease in integrin expression does not explain  
311 how SIRPA immediately prevents phagocytosis of a CD47-bound target, it suggests that  
312 long term exposure to activated SIRPA may decrease overall phagocytic capacity, even  
313 of targets lacking CD47. In addition, SIRPA has been implicated in regulating cell  
314 motility, as fibroblasts lacking SIRPA have impaired motility (Alenghat et al., 2012;  
315 Inagaki et al., 2000; Motegi et al., 2003). In this case, un-ligated SIRPA may instead act  
316 downstream of integrin, as eliminating SIRPA decreases integrin responsiveness  
317 (Alenghat et al., 2012; Inagaki et al., 2000).

318  
319 By suppressing integrin activation, CD47-SIRPA signaling may be able to suppress  
320 many different signaling pathways. Interestingly, CD47 has been reported to affect  
321 dendritic cell activation, cancer cell killing via a nibbling behavior (called trogocytosis),  
322 and complement-mediated engulfment (Caron et al., 2000; Matlung et al., 2018;  
323 Oldenborg et al., 2001; Tamada et al., 2004; Wu et al., 2018; Yi et al., 2015). These  
324 processes are triggered by diverse positive signaling receptors, but all require inside-out  
325 activation of integrin (Caron et al., 2000; Matlung et al., 2018; Oldenborg et al., 2001;  
326 Tamada et al., 2004; Wu et al., 2018; Yi et al., 2015). Targeting integrin, a common co-  
327 receptor, may explain how CD47-SIRPA signaling can regulate these diverse  
328 processes.

329  
330 Finally, we found that integrin activation by manganese can drive engulfment of whole  
331 cancer cells by bone marrow derived macrophages. As a cancer treatment, CD47  
332 blockade synergizes with therapeutic antibodies, like rituximab (Advani et al., 2018;  
333 Chao et al., 2010a). Activating integrins with a small molecule agonist in combination  
334 with antibody therapeutics may have a similar synergistic effect as CD47 blockade.  
335 Small molecule agonists of CD11b, an integrin subunit highly expressed in  
336 macrophages, drive tumor regression in a macrophage-dependent manner (Panni et al.,  
337 2019; Schmid et al., 2018). Our data suggests that these small molecules may allow  
338 macrophages to bypass the CD47 inhibitory signal.

339 **Acknowledgments**

340

341 We thank K. McKinley and O. Klein for providing mouse long bones as a source for  
342 hematopoietic stem cells. We thank members of the Vale lab for critical feedback on this  
343 manuscript. M.A.M. was supported by the National Institute of General Medical  
344 Sciences of the National Institutes of Health under award number F32GM120990. This  
345 work was funded by the Howard Hughes Medical Institute.

346

347 **Competing Financial Interests**

348 The authors declare no competing financial interests.

349

## 350 **Figure Legends**

351

### 352 **Figure 1: CD47-SIRPA suppresses IgG and PS dependent engulfment**

353 (A) Schematic shows the supported lipid bilayer system used in this study. Anti-biotin  
354 IgG is bound to biotinylated lipids. IgG is recognized by Fc Receptor in the  
355 macrophage. The extracellular domain of CD47-His<sub>10</sub> is bound to Ni-NTA-conjugated  
356 lipids and recognized by SIRPA in the macrophage. (B) Silica beads are coated in a  
357 supported lipid bilayer and incubated with the indicated concentration of IgG and  
358 either CD47 (red) or an inactive mutant CD47 (F37D, T115K; green). The  
359 functionalized beads were added to RAW264.7 macrophages and fixed after 30 min.  
360 The average number of beads per macrophage was assessed by confocal microscopy  
361 and normalized to the maximum bead eating observed in that replicate. Each dot  
362 represents an independent replicate (n≥100 cells analyzed per experiment), and the  
363 trendline connects the average of three replicates. (C) Still images depict the assay  
364 described in (B). The supported lipid bilayers contain the fluorescently-labeled lipid  
365 atto390-DOPE (green) and the macrophages membranes are labeled with CellMask  
366 (magenta). Internalized beads are indicated with a yellow dot. (D) Histograms depict  
367 the fraction of cells engulfing the indicated number of beads (pooled data from the  
368 three independent replicates shown in (B)). Macrophages encountering CD47-  
369 conjugated beads (right) were less likely to engulf, and those that did engulfed fewer  
370 beads. CD47<sup>F37D,T115K</sup>, a mutant that cannot bind SIRPA, was used as a control. (E)  
371 Macrophages were incubated with beads coated in a supported lipid bilayer containing  
372 10% phosphatidylserine and either CD47 or the inactive CD47<sup>F37D,T115K</sup>. Data was  
373 normalized to the maximum bead eating observed in that replicate. The complete,  
374 pooled data is shown in Supplementary Figure 1E. Dots and error bars denote the  
375 mean and standard error of independent replicates. \*\*\* indicates p<0.0005 by a  
376 Kruskal-Wallis test on the pooled data (B and E). Scale bar denotes 5 μm in this and  
377 all subsequent figures.

378

379 **Figure 2: Forcing SIRPA into the macrophage-target synapse suppresses**  
380 **engulfment**



381 (A) SIRPA-GFP (top; green in merge) is depleted from the base of the phagocytic cup  
382 (arrow) when a macrophage engulfs a bead functionalized with IgG and CD47<sup>F37D</sup>,  
383 <sup>T115K</sup>, which cannot bind SIRPA (left; supported lipid bilayer, magenta). SIRPA is not  
384 depleted when CD47 is present (IgG+CD47, right). Graph depicts the ratio of SIRPA-  
385 GFP at the phagocytic cup/cell cortex for individual phagocytic cups. (B) A schematic  
386 shows the chimeric SIRPA constructs in this figure. Full length SIRPA is on the right,  
387 FRB<sup>ext</sup>-SIRPA is in the center and FcRI<sup>ext</sup>-SIRPA<sup>int</sup>-GFP is on the left. (C) SIRPA-GFP,  
388 FRB<sup>ext</sup>-SIRPA-GFP and FcRI<sup>ext</sup>-SIRPA<sup>int</sup>-GFP fluorescence is shown at cell-bead  
389 contacts (arrow). (D) Graph depicts the ratio of GFP fluorescence at the synapse  
390 (arrow in C) compared to the cortex for the indicated SIRPA chimeras. (E) A graph  
391 depicts the average number of internalized IgG beads per macrophage expressing the  
392 chimeric SIRPA constructs schematized in (B), normalized to macrophages  
393 expressing only a membrane-tethered GFP (GFP-CAAX). (F) Schematic (left) shows a  
394 system for inducible recruitment of the SIRPA intracellular domain to the phagocytic  
395 cup. Recruiting SIRPA to the phagocytic cup suppresses engulfment compared to  
396 soluble SIRPA or compared to wild-type macrophages treated with rapamycin  
397 (normalized to uninfected macrophages). (G) The graph shows the number of beads  
398 engulfed by uninfected, SIRPA-GFP or FRB<sup>ext</sup>-SIRPA expressing macrophages  
399 normalized to uninfected cells. In A and D, dots represent individual cups, red lines  
400 show mean  $\pm$  SD and data is pooled from three independent experiments. In E, F and  
401 G, dots show the average from an independent replicate with the error bars denoting  
402 SEM for that replicate. The complete pooled data showing the number of beads eaten  
403 per macrophage is shown in Figure S2. \*\*\* denotes  $p < 0.0005$ , \*\* denotes  $p < 0.005$  and  
404 \* denotes  $p < 0.05$  as determined by a Student's T test (A, D) or a Kruskal-Wallis test  
405 on the pooled data from all three replicates (E, F, G).

406

### 407 **Figure 3: CD47 prevents integrin activation**

408 (A) Still images from a TIRF microscopy timelapse show that macrophages form IgG  
409 (black) microclusters as they spread across an IgG bilayer (top). Adding CD47 to the  
410 bilayer inhibits cell spreading (bottom; graphed on right, average area of contact from  
411  $n \geq 11$  cells  $\pm$  SEM, pooled from three separate experiments). (B) TIRF images show

412 the cell membrane (mCherry-CAAX; white) of macrophages engaging with an IgG  
413 (left) or IgG and CD47 (right) bilayer. Graphs depict the average number of cells seen  
414 contacting the bilayer after 10 min (center) and the average area of cell contact (right).  
415 Each dot represents an individual field of view (center) or cell (right) pooled from three  
416 independent experiments. (C) Diagram shows that IgG binding activates Fc Receptor,  
417 which triggers downstream signaling events including inside-out activation of integrins.  
418 Blocking integrin activation using a function-blocking antibody (2E6) targeting the  $\beta 2$   
419 integrin subunit decreased the efficiency of engulfment (graphed in center panel,  
420 normalized to the isotype control, with error bars denoting SEM of each replicate). (D)  
421 Immunofluorescence images show phosphopaxillin (top; green in merge) and F-actin  
422 (center; magenta in merge; visualized with phalloidin) at the phagocytic cup of an IgG  
423 coated bead (left) or an IgG- and CD47-coated bead (right). Graphs show the ratio of  
424 phosphopaxillin intensity at the phagocytic cup/cell cortex. Each dot represents an  
425 individual phagocytic cup; lines denote the mean  $\pm$  SD. The non-activating CD47<sup>F37D</sup>,  
426 T<sup>115K</sup> was used as a control on bilayers lacking CD47. \*\*\* denotes  $p < 0.0005$ , \*\*  
427 denotes  $p < 0.005$ , and \* denotes  $p < 0.05$  as determined by Student's T test (A, B and  
428 D) or a Kruskal-Wallis test on the pooled data (C).

429

430 **Figure 4: Bypassing inside out activation of integrin eliminates the effect of**  
431 **CD47.**

432 (A) The schematic shows a simplified signaling diagram. If CD47 and SIRPA act  
433 upstream of integrin, then providing an alternate means of integrin activation ( $Mn^{2+}$  or  
434 ICAM) should eliminate the effect of CD47. (B) Macrophages were treated with 1 mM  
435  $Mn^{2+}$  and fed beads with IgG and either CD47 (red) or the non-signaling CD47<sup>F37D</sup>,  
436 T<sup>115K</sup> (green). Bars denote the average number of beads eaten from the pooled data of  
437 three independent replicates  $\pm$  SEM. (C) Beads were incubated with the indicated  
438 concentration of IgG and added to macrophages. Treatment with  $Mn^{2+}$  did not  
439 dramatically enhance engulfment (black, compared to grey). Dots represent the  
440 average number of beads eaten  $\pm$  SEM in one data set representative of three  
441 experiments. (D) Immunofluorescence shows that adding ICAM (10 nM coupling  
442 concentration) to IgG + CD47 beads rescues phosphopaxillin (top; green in merge,

443 bottom) at the phagocytic cup. Compare to data displayed in Figure 3D ( $p < 0.0005$  for  
444 phosphopaxilin with ICAM and CD47 compared to CD47 alone). (E) Beads were  
445 functionalized with IgG and either CD47 (red) or the non-signaling CD47<sup>F37D, T115K</sup>  
446 (green). Adding ICAM to the beads abrogated the effect of CD47 (center) but did not  
447 stimulate engulfment without IgG (right). (F) ICAM also rescued actin accumulation at  
448 the phagocytic cup as measured by the ratio of phalloidin fluorescence at the cup to  
449 the cell cortex. (G) Bone marrow-derived macrophages expressing a membrane  
450 tethered GFP (GFP-CAAX) were incubated with L1210 murine leukemia cells  
451 expressing H2B-mCherry. Treating with 100  $\mu$ M manganese allowed for engulfment of  
452 whole cancer cells. These images correspond to frames from Movie S3. (H) The  
453 percent of macrophages engulfing a cancer cell during an 8 hr timelapse is graphed.  
454 Each dot represents an independent replicate, with lines denoting mean  $\pm$  SEM. (I)  
455 Model figure shows that in the absence of CD47 (left), SIRPA is segregated away  
456 from the phagocytic synapse and Fc Receptor binding triggers inside out activation of  
457 integrin. When CD47 is present (right), SIRPA localizes to the synapse and inhibits  
458 integrin activation. \*\*\* denotes  $p < 0.0005$ , \*\* denotes  $p < 0.005$  and n.s. denotes  $p > 0.05$   
459 as determined by a Kruskal-Wallis test (B, E), Ordinary One-way ANOVA (D, F) or  
460 Fisher Exact (H) on the pooled data from all three replicates.  
461

## 462 **Materials and Methods**

463

### 464 **Cell culture**

465 RAW264.7 macrophages were provided by the ATCC and certified mycoplasma-free.  
466 The cells were cultured in DMEM (Gibco, Catalog #11965–092) supplemented with 1 x  
467 Pen-Strep-Glutamine (Corning, Catalog #30–009 CI) 1 mM sodium pyruvate (Gibco,  
468 Catalog #11360-070) and 10% heat inactivated fetal bovine serum (Atlanta Biologicals,  
469 Catalog #S11150H). To keep variation to a minimum, cells were discarded after 20  
470 passages. L1210 cells were also acquired from the ATCC.

471 J774A.1 macrophages were provided by the UCSF cell culture facility. J774A.1 and  
472 293T cells were tested for mycoplasma using the Lonza MycoAlert Detection Kit (Lonza,  
473 Catalog# LT07-318) and control set (Lonza, Catalog #LT07-518).

474 Bone marrow derived macrophages were generated from the hips and long bones of  
475 C57BL/6J mice as previously described (Weischenfeldt and Porse, 2008) except that  
476 purified 25 ng/ml M-CSF (Peprotech, Catalog # 315–02) was used.

477

### 478 **Constructs and antibodies**

479 All relevant information is provided in the STAR methods table, including a detailed  
480 description of the amino acid sequence of each construct and the catalog number of all  
481 antibodies.

482

### 483 **Lentivirus production and infection**

484 All constructs were expressed in RAW264.7 using lentiviral infection. Lentivirus was  
485 produced in HEK293T cells transfected with pMD2.G (a gift from Didier Trono,  
486 Addgene plasmid # 12259 containing the VSV-G envelope protein), pCMV-dR8.91  
487 (since replaced by second generation compatible pCMV-dR8.2, Addgene plasmid  
488 #8455), and a lentiviral backbone vector containing the construct of interest (derived  
489 from pHRSIN-CSGW, see STAR methods) using lipofectamine LTX (Invitrogen, Catalog  
490 # 15338–100). Constructs are described in detail in the Key Resources Table. The  
491 media was harvested 72 hours post-infection, filtered through a 0.45 µm filter and  
492 concentrated using LentiX (Takara Biosciences). After addition of the concentrated

493 virus, cells were centrifuged at 2000xg for 45 min at 37°C. Cells were analyzed a  
494 minimum of 60 hr later.

495

## 496 **Supported lipid bilayer assembly**

### 497 *SUV preparation*

498 The following chloroform-suspended lipids were mixed and desiccated overnight to  
499 remove chloroform: 96.8% POPC (Avanti, Catalog # 850457), 2% Ni<sup>2+</sup>-DGS-NTA  
500 (Avanti, Catalog # 790404), 1% biotinyl cap PE (Avanti, Catalog # 870273), 0.1%  
501 PEG5000-PE (Avanti, Catalog # 880230, and 0.1% atto390-DOPE (ATTO-TEC GmbH,  
502 Catalog # AD 390–161). The lipid sheets were resuspended in PBS, pH7.2 (Gibco,  
503 Catalog # 20012050) and stored under argon. The lipids were broken into small  
504 unilamellar vesicles via several rounds of freeze-thaws. The mixture was cleared using  
505 ultracentrifugation (TLA120.1 rotor, 35,000 rpm / 53,227 x g, 35 min, 4°C). The lipids  
506 were then stored at 4°C under argon for up to two weeks.

507

### 508 *Planar bilayer preparation for TIRF microscopy*

509 Ibbidi coverslips (catalog #10812) were RCA cleaned. Supported lipid bilayers were  
510 assembled in custom plasma cleaned PDMS (Dow Corning, catalog # 3097366-0516  
511 and 3097358-1004) chambers at room temperature for 1 hour. Bilayers were blocked  
512 with 0.2% casein (Sigma, catalog # C5890) in PBS. Proteins were coupled to the bilayer  
513 for 45 min. Imaging was conducted in HEPES buffered saline (20 mM HEPES, 135 mM  
514 NaCl, 4 mM KCl, 10 mM glucose, 1 mM CaCl<sub>2</sub>, 0.5 mM MgCl<sub>2</sub>). Bilayers were assessed  
515 for mobility by either photobleaching or monitoring the mobility of single particles.

516

### 517 *Bead preparation*

518 8.6\*10<sup>8</sup> silica beads with a 5.02 μm diameter (10 μl of 10% solids, Bangs Labs,  
519 Catalog # SS05N) were washed three times with PBS, mixed with 1mM SUVs in PBS  
520 and incubated at room temperature for 0.5-2 hr with end-over-end mixing to allow for  
521 bilayer formation. Beads were then washed three times with PBS to remove excess  
522 SUVs and incubated in 100 μl of 0.2% casein (Sigma, catalog # C5890) in PBS for 15  
523 min before protein coupling. Unless otherwise indicated, anti-biotin AlexaFluor647-IgG

524 (Jackson ImmunoResearch Laboratories Catalog # 200-602-211, Lot # 137445) was  
525 added between 3 and 30 nM, always using the lowest IgG concentration that triggered  
526 engulfment. Purified CD47<sup>ext</sup>-His<sub>10</sub> was added at 1 nM. Proteins were coupled to the  
527 bilayer for 1 hr at room temperature with end-over-end mixing.

528

### 529 *Protein density estimation*

530 Given the high affinity of His<sub>10</sub> for Ni<sup>2+</sup>-DGS-NTA (0.6 nM (Hui and Vale, 2014)), and  
531 antibody-antigen interactions, we expect close to 100% coupling efficiency (Hui and  
532 Vale, 2014). Complete coupling would result in 600 molecules/ $\mu\text{m}^2$  CD47 and 300  
533 molecules/ $\mu\text{m}^2$  IgG for the 3 nM coupling condition. This is well within the range of  
534 CD47 on the surface of a cancer cell (Figure S1). In addition, to estimate the amount of  
535 IgG bound to each bead, we compared the fluorescence of IgG on the bead surface to  
536 calibrated fluorescent beads (Quantum AlexaFluor 647, Bangs Lab) using confocal  
537 microscopy. Using this method, we measured 200-360 molecules/ $\mu\text{m}^2$  of IgG, which is  
538 consistent with the theoretical prediction of near complete coupling.

539

### 540 **Protein Purification**

541 His<sub>10</sub>-CD47<sup>ext</sup>, His<sub>10</sub>-CD47<sup>ext F37D, T115K</sup> (aa40-182; Uniprot Q61735) and ICAM-tagBFP-  
542 His<sub>10</sub> (O'Donoghue et al., 2013) were expressed in SF9 or HiFive cells using the Bac-to-  
543 Bac baculovirus system as described previously (Hui and Vale, 2014). Briefly, the N-  
544 terminal extracellular domain of CD47 was cloned into a modified pFastBac HT A with  
545 an upstream signal peptide from chicken RPTP $\sigma$  (Chang et al., 2016). Insect cell media  
546 containing secreted proteins was harvested 72 hr after infection with baculovirus. His<sub>10</sub>  
547 proteins were purified by using Ni-NTA agarose (Qiagen, Catalog # 30230), followed by  
548 size exclusion chromatography using a Superdex 200 10/300 GL column (GE  
549 Healthcare, Catalog # 17517501). The purification buffer was 30 mM Hepes pH 7.4, 150  
550 mM NaCl, 2 mM MgCl<sub>2</sub>, 5% glycerol (CD47) or 150 mM NaCl, 50 mM Hepes pH 7.4, 5%  
551 glycerol, 2 mM TCEP (ICAM).

552

### 553 **Phosphopaxilin staining**

554 Macrophages were fixed in 4% PFA for 15 min, then permeabilized and blocked with  
555 0.1% BSA in PBS with 0.5% Tween 20. The cells were incubated with the  
556 phosphopaxillin antibody at 1:50 dilution at 4° C overnight before incubating with Alexa  
557 Fluor 555 anti-rabbit secondary (21428), Alexa Fluor 488 phalloidin (A12379).

558

### 559 **β2 integrin block and Fab generation**

560 To disrupt integrin function, the 2E6 anti-β2 integrin antibody (ThermoFisher, MA1805)  
561 or isotype control (ThermoFisher, 16-4888-81) was added to macrophages at 10 μg/ml  
562 30 minutes before IgG-opsonized beads. To eliminate any effects of the Fc domain, we  
563 generated Fabs from these antibodies using the Pierce Fab separation kit  
564 (ThermoFisher 44985).

565

### 566 **Whole cell internalization assay**

567 30,000 macrophages infected with GFP-CAAX were plated in a 96-well glass bottom  
568 MatriPlate (Brooks, Catalog # MGB096-1-2-LG-L). 2 hours prior to imaging, cells were  
569 washed into serum-free, phenol free DMEM for imaging. Manganese (SigmaAldrich,  
570 M8054) was added at 100 μM 30 min prior to imaging. or CD47 function-blocking  
571 antibody clone miap301 (Biolegend, 127520) was used at 10 mg/ml. 100,000 H2B-  
572 mCherry expressing L1210 cells were added and the co-culture was imaged for 8 hr.

573

### 574 **Microscopy and analysis**

575 Images were acquired on a spinning disc confocal microscope (Nikon Ti-Eclipse  
576 inverted microscope with a Yokogawa spinning disk unit and an Andor iXon EM-CCD  
577 camera) equipped with a 40 × 0.95 NA air and a 100 × 1.49 NA oil immersion objective.  
578 The microscope was controlled using μManager. For TIRF imaging, images were  
579 acquired on the same microscope with a motorized TIRF arm, but using a Hamamatsu  
580 Flash 4.0 camera and the 100x 1.49 NA oil immersion objective.

581

### 582 **Quantification of engulfment**

583 30,000 macrophages in one well of a 96-well glass bottom MatriPlate (Brooks, Catalog  
584 # MGB096-1-2-LG-L) between 12 and 24 hr prior to the experiment. Macrophages

585 remained in culture media (DMEM with 10% heat inactivated serum) throughout the  
586 experiment. Unless otherwise indicated,  $\sim 1 \times 10^7$  beads were added to well and  
587 engulfment was allowed to proceed for 30 min. Cells were fixed with 4% PFA and  
588 stained with CellMask (ThermoFisher, catalog # C10045) without membrane  
589 permeabilization to label cell boundaries. Images were acquired using the High Content  
590 Screening (HCS) Site Generator plugin in  $\mu$ Manager (Edelstein et al., 2010).

591

### 592 **Quantification of synapse intensity of phosphoPaxillin, actin and SIRPA** 593 **constructs**

594 Phagocytic cups were selected for analysis based on the presence of clustered IgG at  
595 the cup base (SIRPA chimeras) or clear initiation of membrane extensions around the  
596 phagocytic target (actin, phosphopaxillin). The phagocytic cup and the cell cortex were  
597 traced with a line 3 pixels wide at the Z-slice with the clearest cross section of the cup.  
598 The average background intensity was measured in an adjacent region and subtracted  
599 from each measurement.

600

### 601 **Quantification of the cell-bilayer contact area**

602 For 3A, time-lapse images of macrophages interacting with an IgG or IgG+CD47  
603 bilayer were acquired using TIRF microscopy as described above. Macrophages were  
604 removed from their culture dish using 5% EDTA in PBS, two times washed and  
605 resuspended in the HEPES imaging buffer (20 mM HEPES, 135 mM NaCl, 4 mM KCl,  
606 10 mM glucose, 1 mM  $\text{CaCl}_2$ , 0.5 mM  $\text{MgCl}_2$ ) before being added to the TIRF chamber.  
607 The area of the cell contacting the bilayer was traced in ImageJ beginning with the first  
608 frame where the cell can be detected. Only cells with mobile IgG clusters were included.  
609 For 3B, the number of macrophage-bilayer contacts and the area was quantified in still  
610 images of live cells between 10 and 15 min after cells were added to the bilayer. All  
611 cells were included.

612

### 613 **Statistics**

614 Statistical analysis was performed in Prism 8 (GraphPad, Inc). The statistical test used  
615 is indicated in the relevant figure legend.



## 616 **Supplemental Figure Legends**

617

### 618 **Figure S1, related to Figure 1: A reconstitution system for studying CD47-SIRPA** 619 **signaling**

620 (A) SDS page gel shows the N-terminal extracellular domain of murine CD47 purified  
621 from insect cells using a C-terminal His<sub>10</sub>. (B) Beads coated in supported lipid bilayers  
622 were incubated with the indicated concentration of anti-biotin IgG. The fluorescent  
623 intensity of Alexa Fluor 647-IgG on the bead was measured to ensure that the binding  
624 of IgG increased with higher coupling concentrations. (C) The estimated surface density  
625 of CD47 on red blood cells (Gardner et al., 1991; Mouro-Chanteloup et al., 2003), T  
626 cells (Subramanian et al., 2006), cancer cells (Dheilly et al., 2017; Jaiswal et al., 2009;  
627 Michaels et al., 2017) and the beads used in this study. (D) IgG surface density was  
628 held constant while CD47 density was titrated. The 1 nM CD47 coupling concentration  
629 was selected for use throughout this study. (E) Histograms depict the fraction of  
630 macrophages engulfing the indicated number of phosphatidylserine beads. The  
631 RAW264.7 histograms correspond to the replicates depicted in Figure 1E. RAW264.7  
632 engulfment was measured after 30 min and J774A.1 was measured after 90 min.

633

### 634 **Figure S2, related to Figure 2: Forcing SIRPA into the macrophage-target synapse** 635 **suppresses engulfment**

636 (A) Schematic depicts TIRF imaging. (B) TIRF microscopy of J774A.1 macrophages  
637 encountering a 10% phosphatidylserine bilayer reveals that SIRPA-GFP is depleted at  
638 the center off the cell-bilayer synapse (top; yellow arrow compared to cyan arrow).  
639 Macrophages did not form this zone of depletion when encountering a bilayer containing  
640 both phosphatidylserine and CD47 (bottom). The ratio of SIRPA-GFP fluorescent  
641 intensity at the cell center/cell edge is quantified on the right. Each dot represents an  
642 individual cell and data is pooled from 3 independent experiments. Lines denote the  
643 mean  $\pm$  SD. \*\*\* denotes  $p < 0.0005$  by Student's T test. (C) SIRPA-GFP and the chimeric  
644 receptors FcRI<sup>ext</sup>-SIRPA<sup>int</sup>-GFP and FRB<sup>ext</sup>-SIRPA are expressed at similar levels.  
645 Fluorescent intensity was normalized to the average intensity of SIRPA-GFP in that  
646 experiment. Each dot represents an individual cell and data is pooled from 3

647 independent experiments. Lines denote the mean  $\pm$  SD. (D, E and F) Histograms depict  
648 the fraction of macrophages engulfing the indicated number of IgG-bound beads. The  
649 average number of beads per cell is shown  $\pm$  SEM. This data corresponds to 1E (D), 1F  
650 (E) and 1G (F). For all panels, data is pooled from three data is pooled from 3  
651 independent experiments. Lines denote the mean  $\pm$  SD.

652

653 **Figure S3, related to Figure 3: CD47 does not affect FcR activation and Syk**  
654 **recruitment.**

655 (A) TIRF microscopy shows that macrophages are able to form IgG microclusters (left;  
656 cyan in merged image) that recruit Syk (middle; magenta in merged image) if CD47 is  
657 absent (top) or present (bottom). Inset shows the boxed region of the image above. The  
658 linescan shows the fluorescent intensity of Alexa Fluor 647-IgG and Syk-mCherry at the  
659 indicated position (white arrow). Intensity was normalized so that 1 is the highest  
660 observed intensity and 0 is background. The fraction of cells able to form IgG clusters  
661 and recruit Syk is displayed on the far right. Each dot represents the percent from an  
662 independent experiment ( $n \geq 20$  per replicate) and the lines denote mean  $\pm$  SD. (B)  
663 TIRF microscopy shows that, in the presence of CD47, SIRPA (green) does not co-  
664 localize with IgG clusters (cyan; arrowheads). Inset shows the boxed region in the  
665 above image. The linescan shows the fluorescent intensity of Alexa Fluor 647-IgG and  
666 SIRPA-GFP at the position indicated by a white arrow. (C) Macrophages were  
667 incubated with a Fab generated from the  $\beta 2$  function-blocking antibody (2E6, red) or  
668 from an isotype control (green). The pooled data from three independent replicates is  
669 graphed with error bars denoting SEM. \*\* indicates  $p < 0.005$  by Kruskal-Wallis test.

670

671 **Figure S4, related to Figure 4: Manganese does not affect L1210 viability**

672 L1210 cells were serum starved for 2 hrs, then treated with 100  $\mu$ M manganese for 6  
673 hrs as in 2H. The percent of cells that bound high levels of annexin, indicating  
674 phosphatidylserine exposure and the initiation of apoptosis, was measured by flow  
675 cytometry.

676

677 **Movie S1: Macrophage encounters IgG bound to a supported lipid bilayer.**

678 TIRF imaging (see schematic in Figure S2) shows Alexa Fluor 647-IgG (black) in the  
679 supported lipid bilayer as a macrophage engages with an IgG-bound target. Frames  
680 were acquired every 20 sec and time is indicated in the top left. Scale bar denotes 5  
681  $\mu\text{m}$ .

682

683 **Movie S2: Macrophage encounters IgG and CD47 bound to a supported lipid**  
684 **bilayer.**

685 TIRF imaging shows Alexa Fluor 647-IgG (black) in the supported lipid bilayer as a  
686 macrophage engages with an IgG and CD47-bound target. Frames were acquired every  
687 20 sec and time is indicated in the top left. Scale bar denotes 5  $\mu\text{m}$ .

688

689 **Movie S3: An Mn-treated macrophage encounters an L1210 leukemia cell**

690 A macrophage infected with GFP- CAAX encounters an L1210 leukemia cell labeled  
691 with H2B-mCherry. In the presence of 100  $\mu\text{M}$   $\text{Mn}^{2+}$  the macrophage is able to engulf  
692 the cancer cell. Images were acquired every 5 min for 140 min. The field of view is 53  
693  $\mu\text{m}$  by 53  $\mu\text{m}$ .

694

## 695 **References**

- 696 Advani, R., Flinn, I., Popplewell, L., Forero, A., Bartlett, N.L., Ghosh, N., Kline, J.,  
697 Roschewski, M., LaCasce, A., Collins, G.P., et al. (2018). CD47 Blockade by Hu5F9-G4  
698 and Rituximab in Non-Hodgkin's Lymphoma. *N. Engl. J. Med.* 379, 1711–1721.
- 699 Alenghat, F.J., Baca, Q.J., Rubin, N.T., Pao, L.I., Matozaki, T., Lowell, C.A., Golan,  
700 D.E., Neel, B.G., and Swanson, K.D. (2012). Macrophages require Skap2 and Sirpa for  
701 integrin-stimulated cytoskeletal rearrangement. *J. Cell Sci.* 125, 5535–5545.
- 702 Barclay, A.N., and Brown, M.H. (2006). The SIRP family of receptors and immune  
703 regulation. *Nat. Rev. Immunol.* 6, 457–464.
- 704 Birge, R.B., Boeltz, S., Kumar, S., Carlson, J., Wanderley, J., Calianese, D., Barcinski,  
705 M., Brekken, R.A., Huang, X., Hutchins, J.T., et al. (2016). Phosphatidylserine is a  
706 global immunosuppressive signal in efferocytosis, infectious disease, and cancer. *Cell*  
707 *Death Differ.* 23, 962–978.
- 708 Campbell, H., Heidema, C., Pilarczyk, D.G., and DeMali, K.A. (2018). SHP-2 is  
709 activated in response to force on E-cadherin and dephosphorylates vinculin Y822. *J.*  
710 *Cell Sci.* 131, jcs216648.
- 711 Caron, E., Self, A.J., and Hall, A. (2000). The GTPase Rap1 controls functional  
712 activation of macrophage integrin alphaMbeta2 by LPS and other inflammatory  
713 mediators. *Curr. Biol.* 10, 974–978.
- 714 Chang, V.T., Fernandes, R.A., Ganzinger, K.A., Lee, S.F., Siebold, C., McColl, J.,  
715 Jönsson, P., Palayret, M., Harlos, K., Coles, C.H., et al. (2016). Initiation of T cell  
716 signaling by CD45 segregation at “close contacts”. *Nat. Immunol.* 17, 574–582.
- 717 Chao, M.P., Alizadeh, A.A., Tang, C., Myklebust, J.H., Varghese, B., Gill, S., Jan, M.,  
718 Cha, A.C., Chan, C.K., Tan, B.T., et al. (2010a). Anti-CD47 Antibody Synergizes with  
719 Rituximab to Promote Phagocytosis and Eradicate Non-Hodgkin Lymphoma. *Cell* 142,  
720 699–713.
- 721 Chao, M.P., Jaiswal, S., Weissman-Tsukamoto, R., Alizadeh, A.A., Gentles, A.J.,  
722 Volkmer, J., Weiskopf, K., Willingham, S.B., Raveh, T., Park, C.Y., et al. (2010b).  
723 Calreticulin Is the Dominant Pro-Phagocytic Signal on Multiple Human Cancers and Is  
724 Counterbalanced by CD47. *Sci. Transl. Med.* 2, 63ra94-63ra94.
- 725 Chao, M.P., Weissman, I.L., and Majeti, R. (2012). The CD47-SIRP $\alpha$  pathway in cancer

726 immune evasion and potential therapeutic implications. *Curr. Opin. Immunol.* *24*, 225–  
727 232.

728 Chen, J., Zhong, M.-C., Guo, H., Davidson, D., Mishel, S., Lu, Y., Rhee, I., Pérez-  
729 Quintero, L.-A., Zhang, S., Cruz-Munoz, M.-E., et al. (2017). SLAMF7 is critical for  
730 phagocytosis of haematopoietic tumour cells via Mac-1 integrin. *Nature* *544*, 493–497.

731 Dheilly, E., Moine, V., Broyer, L., Salgado-Pires, S., Johnson, Z., Papaioannou, A.,  
732 Cons, L., Calloud, S., Majocchi, S., Nelson, R., et al. (2017). Selective Blockade of the  
733 Ubiquitous Checkpoint Receptor CD47 Is Enabled by Dual-Targeting Bispecific  
734 Antibodies. *Mol. Ther.* *25*, 523–533.

735 Dransfield, I., Cabanas, C., Craig, A., and Hogg, N. (1992). Divalent Cation Regulation  
736 of the Function of the Leukocyte Integrin LFA1.

737 Dupuy, A.G., and Caron, E. (2008). Integrin-dependent phagocytosis: spreading from  
738 microadhesion to new concepts. *J. Cell Sci.* *121*, 1773–1783.

739 Edelstein, A., Amodaj, N., Hoover, K., Vale, R., and Stuurman, N. (2010). Computer  
740 control of microscopes using manager. *Curr. Protoc. Mol. Biol.* *Chapter 14*, Unit14 20.

741 Fadok, V.A., Voelker, D.R., Campbell, P.A., Cohen, J.J., Bratton, D.L., and Henson,  
742 P.M. (1992). Exposure of phosphatidylserine on the surface of apoptotic lymphocytes  
743 triggers specific recognition and removal by macrophages. *J. Immunol.* *148*, 2207–  
744 2216.

745 Freeman, S.A., and Grinstein, S. (2014). Phagocytosis: Receptors, signal integration,  
746 and the cytoskeleton. *Immunol. Rev.* *262*, 193–215.

747 Freeman, S.A., Goyette, J., Furuya, W., Woods, E.C., Bertozzi, C.R., Bergmeier, W.,  
748 Hinz, B., Van Der Merwe, P.A., Das, R., and Grinstein, S. (2016). Integrins Form an  
749 Expanding Diffusional Barrier that Coordinates Phagocytosis. *Cell* *164*, 128–140.

750 Fujioka, Y., Matozaki, T., Noguchi, T., Iwamatsu, A., Yamao, T., Takahashi, N., Tsuda,  
751 M., Takada, T., and Kasuga, M. (1996). A novel membrane glycoprotein, SHPS-1, that  
752 binds the SH2-domain-containing protein tyrosine phosphatase SHP-2 in response to  
753 mitogens and cell adhesion. *Mol. Cell. Biol.* *16*, 6887–6899.

754 Gardai, S.J., McPhillips, K.A., Frasch, S.C., Janssen, W.J., Starefeldt, A., Murphy-  
755 Ullrich, J.E., Bratton, D.L., Oldenborg, P.-A.A., Michalak, M., and Henson, P.M. (2005).  
756 Cell-surface calreticulin initiates clearance of viable or apoptotic cells through trans-

757 activation of LRP on the phagocyte. *Cell* 123, 321–334.

758 Gardner, B., Anstee, D.J., Mawby, W.J., Tanner, M.J., and von dem Borne, A.E. (1991).

759 The abundance and organization of polypeptides associated with antigens of the Rh

760 blood group system. *Transfus. Med.* 1, 77–85.

761 Geiger, B., Spatz, J.P., and Bershadsky, A.D. (2009). Environmental sensing through

762 focal adhesions. *Nat. Rev. Mol. Cell Biol.* 10, 21–33.

763 Gholamin, S., Mitra, S.S., Feroze, A.H., Liu, J., Kahn, S.A., Zhang, M., Esparza, R.,

764 Richard, C., Ramaswamy, V., Remke, M., et al. (2017). Disrupting the CD47-SIRP $\alpha$

765 anti-phagocytic axis by a humanized anti-CD47 antibody is an efficacious treatment for

766 malignant pediatric brain tumors. *Sci. Transl. Med.* 9, eaaf2968.

767 Goodridge, H.S., Reyes, C.N., Becker, C.A., Katsumoto, T.R., Ma, J., Wolf, A.J., Bose,

768 N., Chan, A.S.H., Magee, A.S., Danielson, M.E., et al. (2011). Activation of the innate

769 immune receptor Dectin-1 upon formation of a ‘phagocytic synapse.’ *Nature* 472, 471–

770 475.

771 Hatherley, D., Graham, S.C., Turner, J., Harlos, K., Stuart, D.I., and Barclay, A.N.

772 (2008). Paired Receptor Specificity Explained by Structures of Signal Regulatory

773 Proteins Alone and Complexed with CD47. *Mol. Cell* 31, 266–277.

774 Hui, E., and Vale, R.D. (2014). In vitro membrane reconstitution of the T-cell receptor

775 proximal signaling network. *Nat. Struct. Mol. Biol.* 21, 133–142.

776 Inagaki, K., Yamao, T., Noguchi, T., Matozaki, T., Fukunaga, K., Takada, T., Hosooka,

777 T., Akira, S., and Kasuga, M. (2000). SHPS-1 regulates integrin-mediated cytoskeletal

778 reorganization and cell motility. *EMBO J.* 19, 6721–6731.

779 Jaiswal, S., Jamieson, C.H.M., Pang, W.W., Park, C.Y., Chao, M.P., Majeti, R., Traver,

780 D., van Rooijen, N., and Weissman, I.L. (2009). CD47 Is Upregulated on Circulating

781 Hematopoietic Stem Cells and Leukemia Cells to Avoid Phagocytosis. *Cell* 138, 271–

782 285.

783 James, J.R., and Vale, R.D. (2012). Biophysical mechanism of T-cell receptor triggering

784 in a reconstituted system. *Nature* 487, 64–69.

785 Jiang, P., Lagenaur, C.F., and Narayanan, V. (1999). Integrin-associated protein is a

786 ligand for the P84 neural adhesion molecule. *J. Biol. Chem.* 274, 559–562.

787 Jones, S.L., Knaus, U.G., Bokoch, G.M., and Brown, E.J. (1998). Two signaling

788 mechanisms for activation of alphaM beta2 avidity in polymorphonuclear neutrophils. *J.*  
789 *Biol. Chem.* 273, 10556–10566.

790 Lin, J., Kurilova, S., Scott, B.L., Bosworth, E., Iverson, B.E., Bailey, E.M., and Hoppe,  
791 A.D. (2016). TIRF imaging of Fc gamma receptor microclusters dynamics and signaling  
792 on macrophages during frustrated phagocytosis. *BMC Immunol.* 17, 5.

793 Liu, D.Q., Li, L.M., Guo, Y.L., Bai, R., Wang, C., Bian, Z., Zhang, C.Y., and Zen, K.  
794 (2008). Signal regulatory protein  $\alpha$  negatively regulates  $\beta$  2 integrin-mediated monocyte  
795 adhesion, transendothelial migration and phagocytosis. *PLoS One* 3.

796 Liu, X., Pu, Y., Cron, K., Deng, L., Kline, J., Frazier, W.A., Xu, H., Peng, H., Fu, Y.-X.,  
797 and Xu, M.M. (2015). CD47 blockade triggers T cell-mediated destruction of  
798 immunogenic tumors. *Nat. Med.* 21, 1209–1215.

799 Majeti, R., Chao, M.P., Alizadeh, A.A., Pang, W.W., Jaiswal, S., Gibbs, K.D., van  
800 Rooijen, N., and Weissman, I.L. (2009). CD47 Is an Adverse Prognostic Factor and  
801 Therapeutic Antibody Target on Human Acute Myeloid Leukemia Stem Cells. *Cell* 138,  
802 286–299.

803 Matlung, H.L., Babes, L., Zhao, X.W., van Houdt, M., Treffers, L.W., van Rees, D.J.,  
804 Franke, K., Schornagel, K., Verkuijlen, P., Janssen, H., et al. (2018). Neutrophils Kill  
805 Antibody-Opsonized Cancer Cells by Trogoptosis. *Cell Rep.* 23, 3946-3959.e6.

806 Michaels, A.D., Newhook, T.E., Adair, S.J., Morioka, S., Goudreau, B.J., Nagdas, S.,  
807 Mullen, M.G., Persily, J.B., Bullock, T.N.J., Slingluffjr, C.L., et al. (2017). Cancer  
808 Therapy: Preclinical CD47 Blockade as an Adjuvant Immunotherapy for Resectable  
809 Pancreatic Cancer.

810 Motegi, S. -i., Okazawa, H., Ohnishi, H., Sato, R., Kaneko, Y., Kobayashi, H.,  
811 Tomizawa, K., Ito, T., Honma, N., Bühring, H., et al. (2003). Role of the CD47-SHPS-1  
812 system in regulation of cell migration. *EMBO J.* 22, 2634–2644.

813 Mouro-Chanteloup, I., Delaunay, J., Gane, P., Nicolas, V., Johansen, M., Brown, E.J.,  
814 Peters, L.L., Van Kim, C. Le, Cartron, J.P., and Colin, Y. (2003). Evidence that the red  
815 cell skeleton protein 4.2 interacts with the Rh membrane complex member CD47. *Blood*  
816 101, 338–344.

817 Noguchi, T., Matozaki, T., Fujioka, Y., Yamao, T., Tsuda, M., Takada, T., and Kasuga,  
818 M. (1996). Characterization of a 115-kDa protein that binds to SH-PTP2, a protein-

819 tyrosine phosphatase with Src homology 2 domains, in Chinese hamster ovary cells. *J.*  
820 *Biol. Chem.* *271*, 27652–27658.

821 O'Donoghue, G.P., Pielak, R.M., Smoligovets, A.A., Lin, J.J., and Groves, J.T. (2013).  
822 Direct single molecule measurement of TCR triggering by agonist pMHC in living  
823 primary T cells. *Elife* *2*.

824 Okazawa, H., Motegi, S. -i., Ohyama, N., Ohnishi, H., Tomizawa, T., Kaneko, Y.,  
825 Oldenborg, P.-A., Ishikawa, O., and Matozaki, T. (2005). Negative Regulation of  
826 Phagocytosis in Macrophages by the CD47-SHPS-1 System. *J. Immunol.* *174*, 2004–  
827 2011.

828 Oldenborg, P.-A., Gresham, H.D., and Lindberg, F.P. (2001). Cd47-Signal Regulatory  
829 Protein  $\alpha$  (Sirp $\alpha$ ) Regulates Fc $\gamma$  and Complement Receptor–Mediated Phagocytosis. *J.*  
830 *Exp. Med.* *193*, 855–862.

831 Oldenborg, P.A., Zheleznyak, A., Fang, Y.F., Lagenaur, C.F., Gresham, H.D., and  
832 Lindberg, F.P. (2000). Role of CD47 as a marker of self on red blood cells. *Science* *288*,  
833 2051–2054.

834 Panni, R.Z., Herndon, J.M., Zuo, C., Hegde, S., Hogg, G.D., Knolhoff, B.L., Breden,  
835 M.A., Li, X., Krisnawan, V.E., Khan, S.Q., et al. (2019). Agonism of CD11b reprograms  
836 innate immunity to sensitize pancreatic cancer to immunotherapies. *Sci. Transl. Med.*  
837 *11*, eaau9240.

838 Poon, I.K.H., Lucas, C.D., Rossi, A.G., and Ravichandran, K.S. (2014). Apoptotic cell  
839 clearance: basic biology and therapeutic potential. *Nat. Rev. Immunol.* *14*, 166–180.

840 Schmid, E.M., Bakalar, M.H., Choudhuri, K., Weichsel, J., Ann, H.S., Geissler, P.L.,  
841 Dustin, M.L., and Fletcher, D.A. (2016). Size-dependent protein segregation at  
842 membrane interfaces. *Nat. Phys.* *12*, 704–711.

843 Schmid, M.C., Khan, S.Q., Kaneda, M.M., Pathria, P., Shepard, R., Louis, T.L., Anand,  
844 S., Woo, G., Leem, C., Faridi, M.H., et al. (2018). Integrin CD11b activation drives anti-  
845 tumor innate immunity. *Nat. Commun.* *9*, 5379.

846 Seiffert, M., Cant, C., Chen, Z., Rappold, I., Brugger, W., Kanz, L., Brown, E.J., Ullrich,  
847 A., and Bühring, H.J. (1999). Human signal-regulatory protein is expressed on normal,  
848 but not on subsets of leukemic myeloid cells and mediates cellular adhesion involving  
849 its counterreceptor CD47. *Blood* *94*, 3633–3643.



850 Spencer, D.M., Wandless, T.J., Schreiber, S.L., and Crabtree, G.R. (1993). Controlling  
851 signal transduction with synthetic ligands. *Science* 262, 1019–1024.

852 Springer, T.A., and Dustin, M.L. (2011). Integrin inside-out signaling and the  
853 immunological synapse. *Curr. Opin. Cell Biol.* 24, 107–115.

854 Subramanian, S., Parthasarathy, R., Sen, S., Boder, E.T., and Discher, D.E. (2006).  
855 Species-and cell type-specific interactions between CD47 and human SIRP $\alpha$ . *Blood*  
856 107, 2548–2556.

857 Tamada, M., Sheetz, M.P., and Sawada, Y. (2004). Activation of a Signaling Cascade  
858 by Cytoskeleton Stretch. *Dev. Cell* 7, 709–718.

859 Tsai, R.K., and Discher, D.E. (2008). Inhibition of “self” engulfment through deactivation  
860 of myosin-II at the phagocytic synapse between human cells. *J. Cell Biol.* 180, 989–  
861 1003.

862 Tseng, D., Volkmer, J.-P.J.-P., Willingham, S.B., Contreras-Trujillo, H., Fathman, J.W.,  
863 Fernhoff, N.B., Seita, J., Inlay, M.A., Weiskopf, K., Miyanishi, M., et al. (2013). Anti-  
864 CD47 antibody-mediated phagocytosis of cancer by macrophages primes an effective  
865 antitumor T-cell response. *Proc. Natl. Acad. Sci.* 110, 11103–11108.

866 Utsugi, T., Schroit, A.J., Connor, J., Bucana, C.D., and Fidler, I.J. (1991). Elevated  
867 expression of phosphatidylserine in the outer membrane leaflet of human tumor cells  
868 and recognition by activated human blood monocytes. *Cancer Res.* 51, 3062–3066.

869 Veillette, A., Thibaudeau, E., and Latour, S. (1998). High expression of inhibitory  
870 receptor SHPS-1 and its association with protein-tyrosine phosphatase SHP-1 in  
871 macrophages. *J. Biol. Chem.* 273, 22719–22728.

872 Weischenfeldt, J., and Porse, B. (2008). Bone Marrow-Derived Macrophages (BMM):  
873 Isolation and Applications. *CSH Protoc.* 2008, pdb.prot5080.

874 Willingham, S.B., Volkmer, J.-P., Gentles, A.J., Sahoo, D., Dalerba, P., Mitra, S.S.,  
875 Wang, J., Contreras-Trujillo, H., Martin, R., Cohen, J.D., et al. (2012). The CD47-signal  
876 regulatory protein alpha (SIRP $\alpha$ ) interaction is a therapeutic target for human solid  
877 tumors. *Proc. Natl. Acad. Sci.* 109, 6662–6667.

878 Wong, H.S., Jaumouillé, V., Freeman, S.A., Doodnauth, S.A., Schlam, D., Canton, J.,  
879 Mukovozov, I.M., Saric, A., Grinstein, S., and Robinson, L.A. (2016). Chemokine  
880 Signaling Enhances CD36 Responsiveness toward Oxidized Low-Density Lipoproteins

881 and Accelerates Foam Cell Formation. *Cell Rep.* *14*, 2859–2871.

882 Wu, J., Wu, H., An, J., Ballantyne, C.M., and Cyster, J.G. (2018). Critical role of integrin  
883 CD11c in splenic dendritic cell capture of missing-self CD47 cells to induce adaptive  
884 immunity. *Proc. Natl. Acad. Sci.* 201805542.

885 Yi, T., Li, J., Chen, H., Hu, Y., Lowell, C.A., and Cyster Correspondence, J.G. (2015).  
886 Splenic Dendritic Cells Survey Red Blood Cells for Missing Self-CD47 to Trigger  
887 Adaptive Immune Responses. *Immunity* *43*, 764–775.

888 Yu, D.H., Qu, C.K., Henegariu, O., Lu, X., and Feng, G.S. (1998). Protein-tyrosine  
889 phosphatase Shp-2 regulates cell spreading, migration, and focal adhesion. *J. Biol.*  
890 *Chem.* *273*, 21125–21131.

891

892

## Figure 1: CD47-SIRPA suppresses IgG and PS dependent engulfment

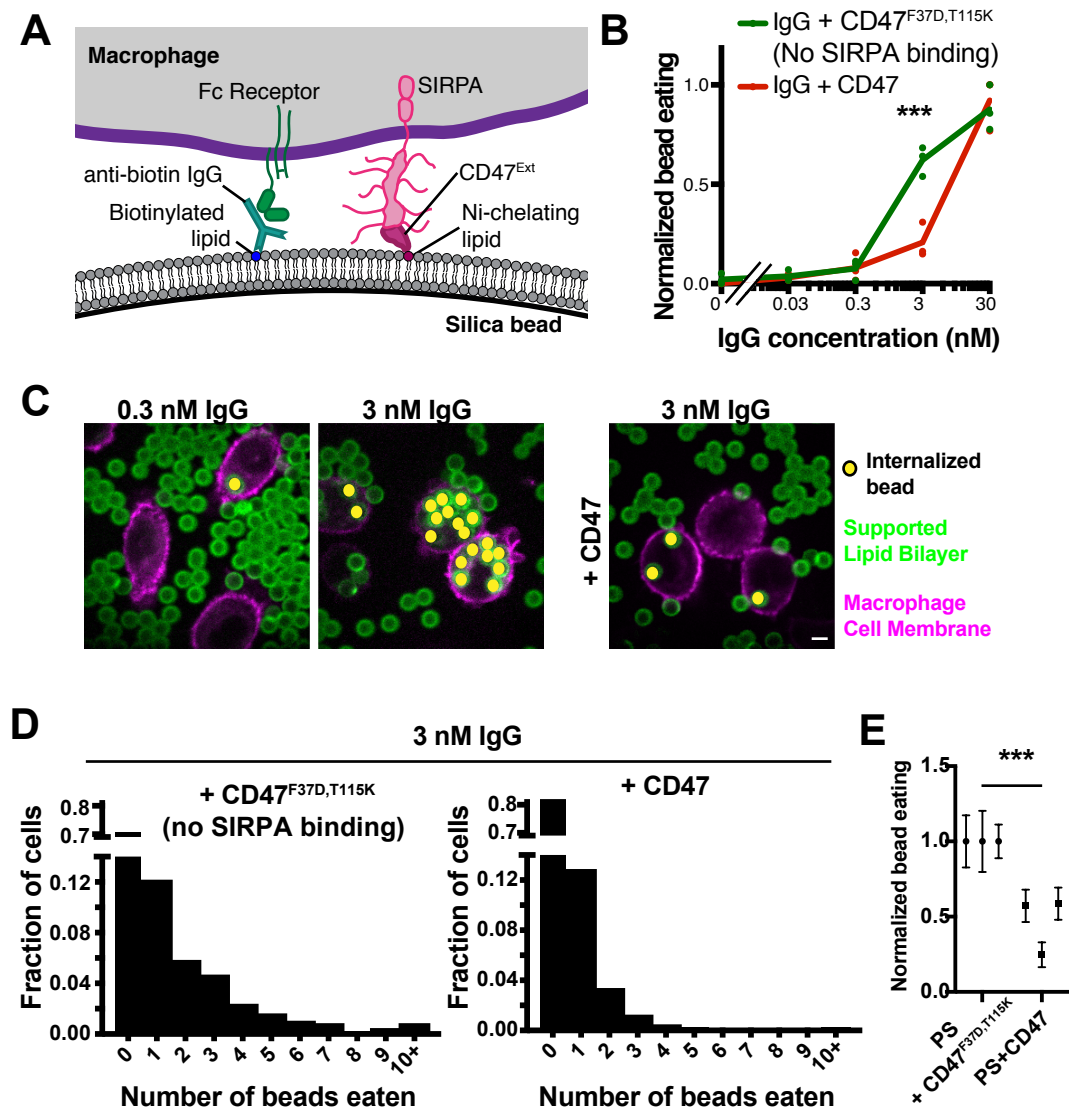

## Figure 2: Forcing SIRPA into the macrophage-target synapse suppresses engulfment

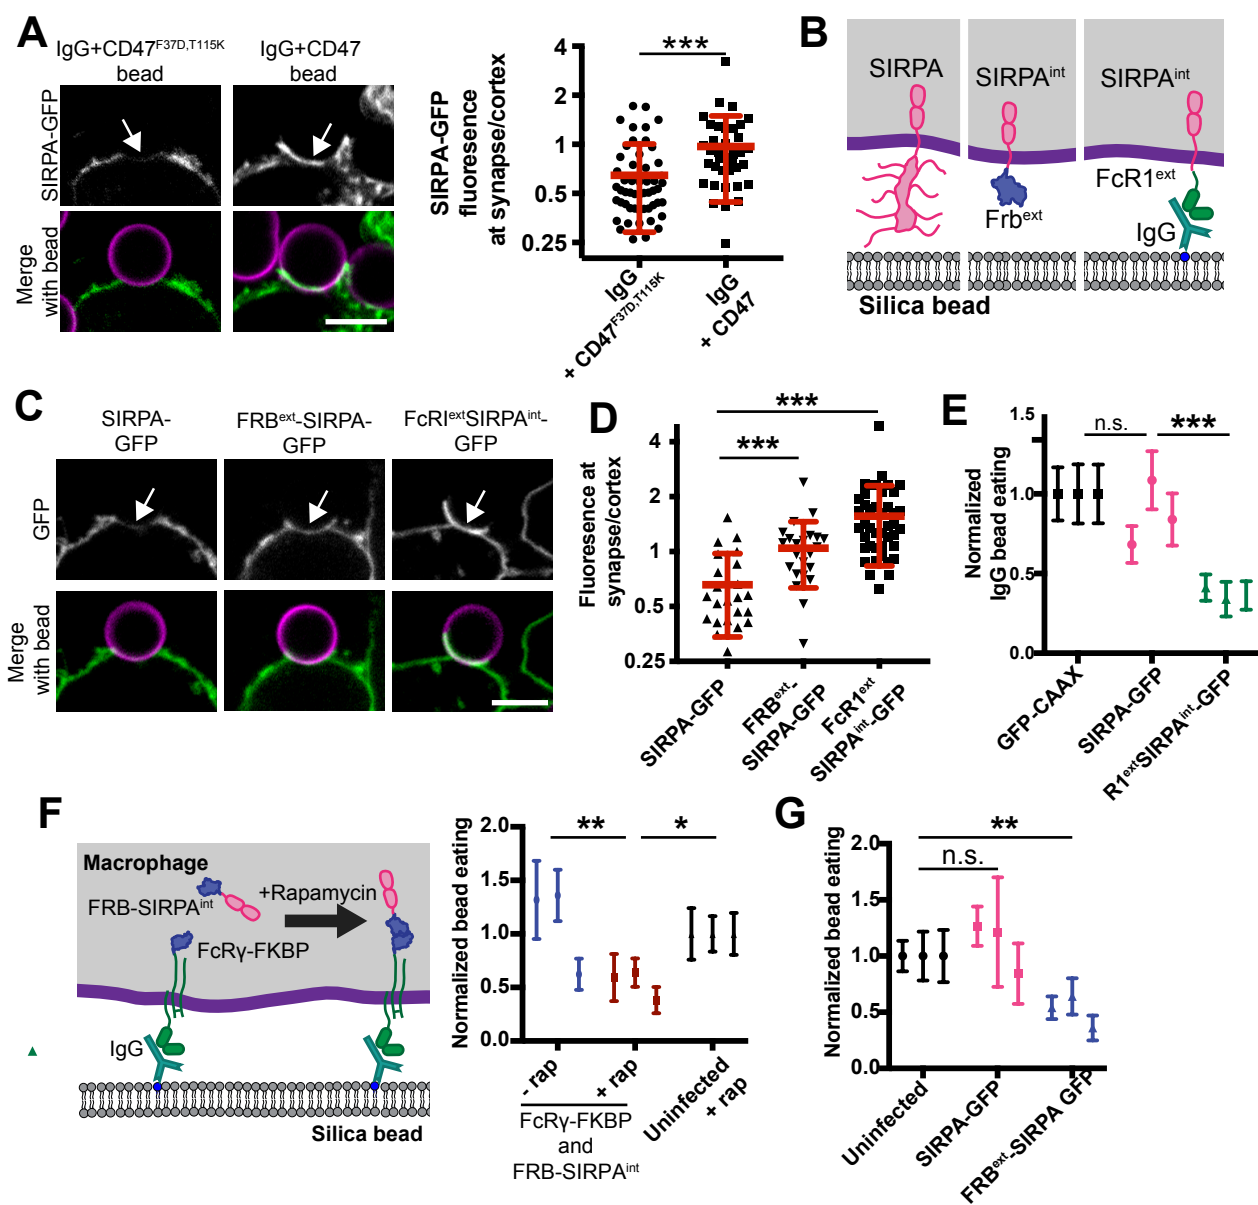

## Figure 3: CD47 prevents integrin activation

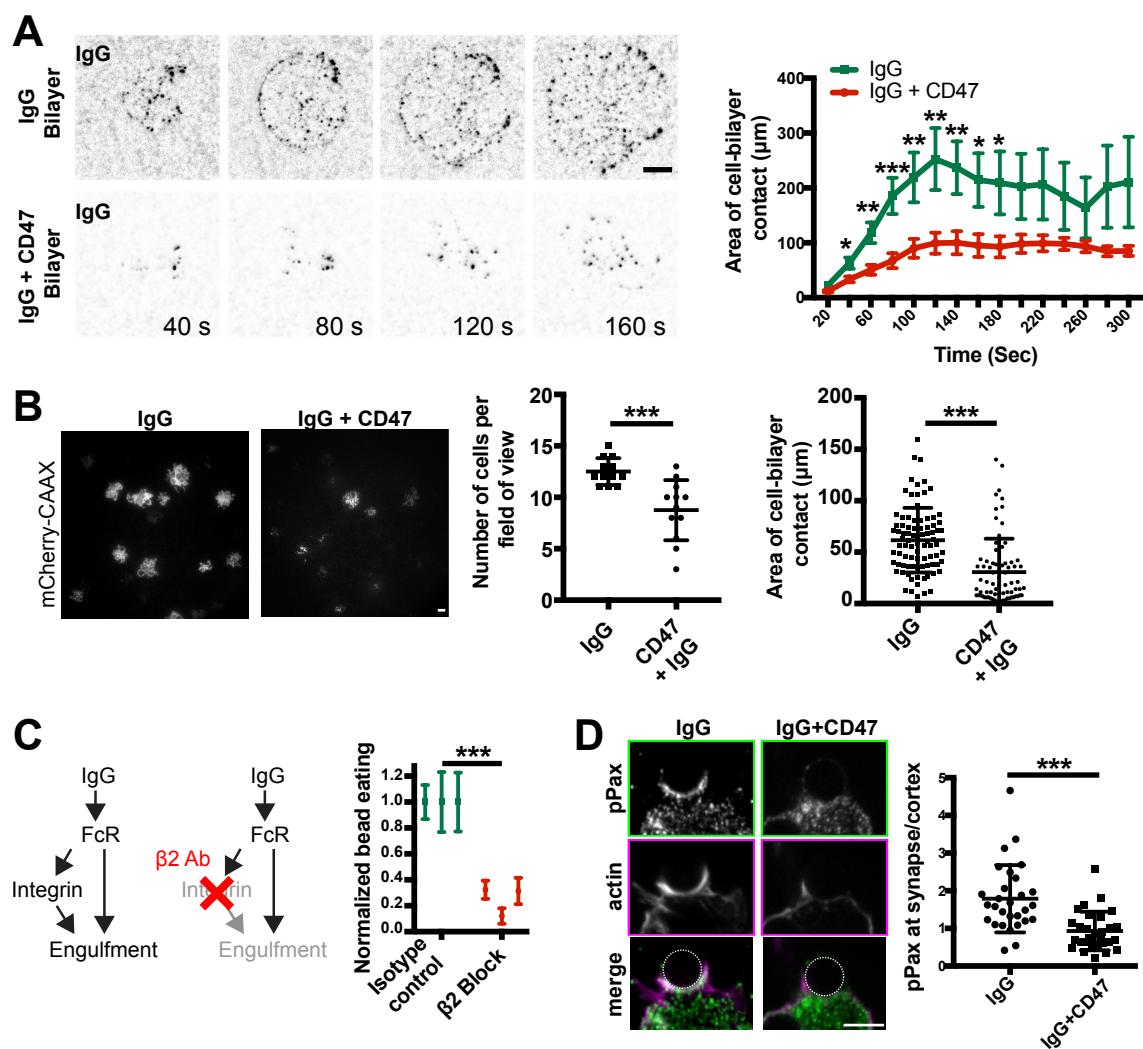

## Figure 4: Bypassing integrin activation eliminates the effect of CD47.

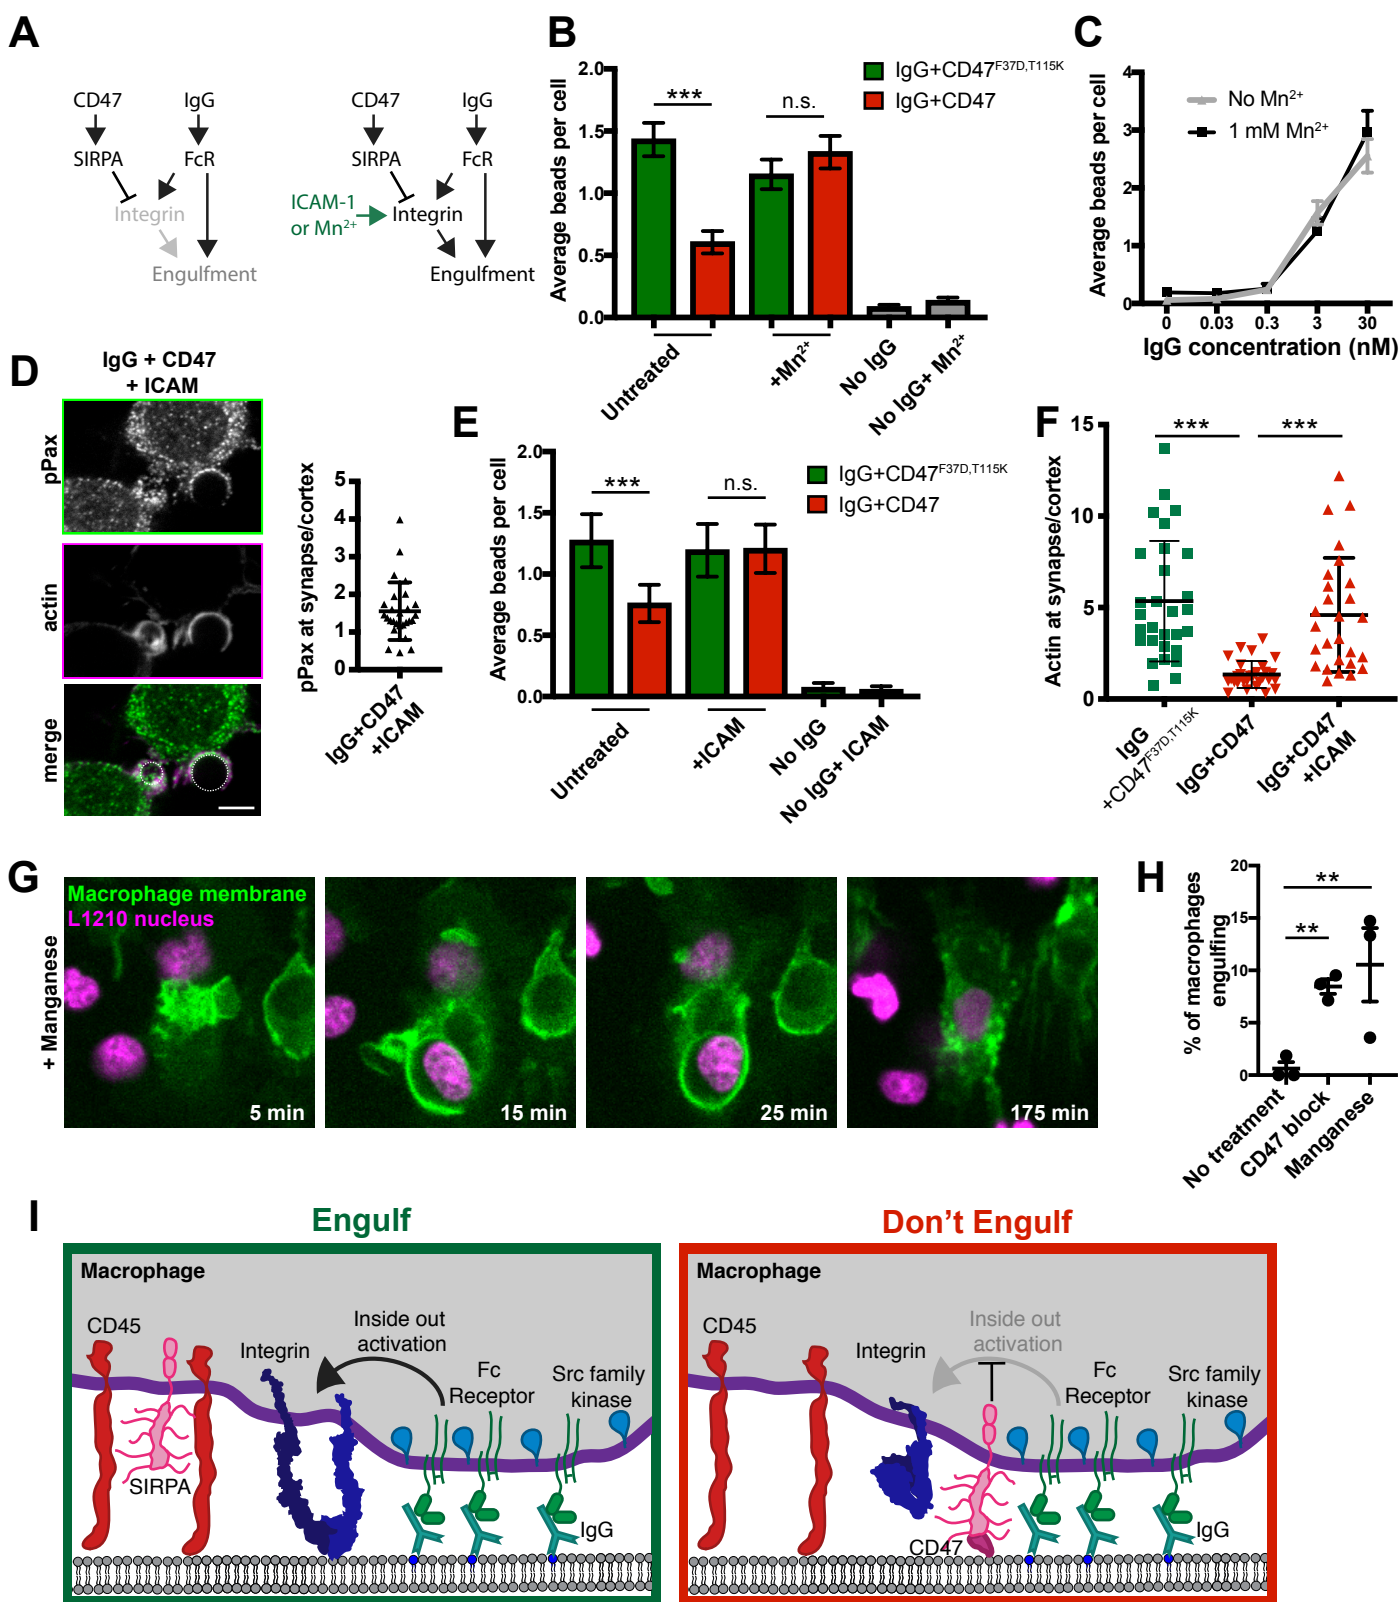

Source: https://www.biorxiv.org/content/10.1101/752311v1.full.pdf
