# Supplementary material for: CD47 suppresses phagocytosis by repositioning SIRPA and preventing integrin activation
Source: bioRxiv or medRxiv preprint supplement (doi:10.1101/752311), 2019-08-30

# Figure S1, related to Figure 1: A reconstitution system for studying CD47-SIRPA signaling

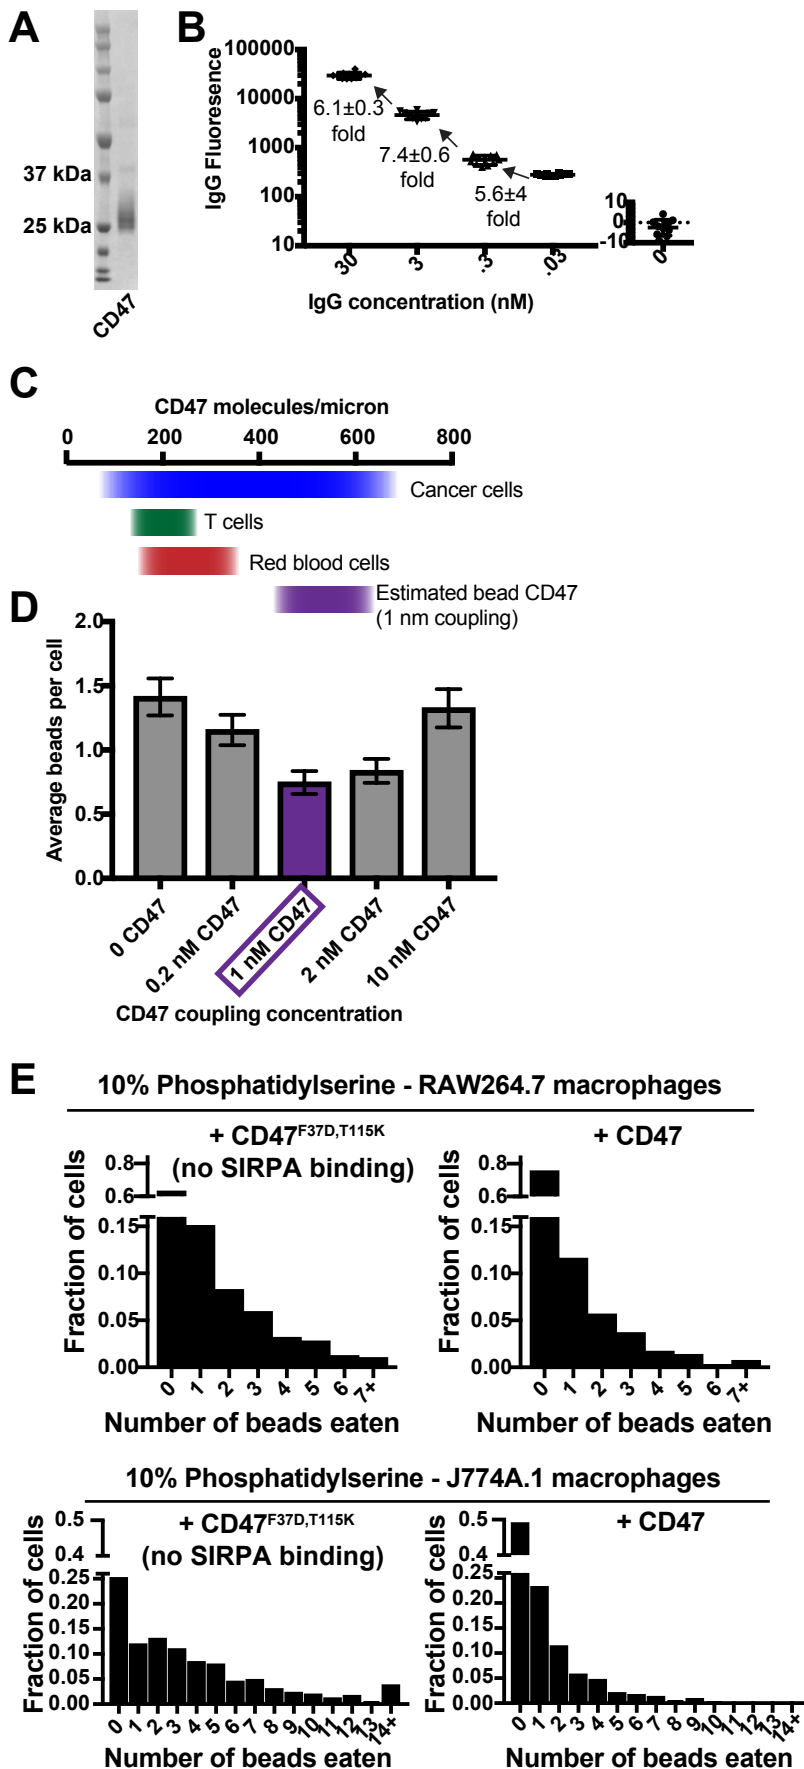

Supplement: Supplementary file [file media-4.pdf]
