# Supplementary material for: CD47 suppresses phagocytosis by repositioning SIRPA and preventing integrin activation
Source: bioRxiv or medRxiv preprint supplement (doi:10.1101/752311), 2019-08-30

# Figure S2, related to Figure 2: Forcing SIRPA into the macrophage-target synapse suppresses engulfment

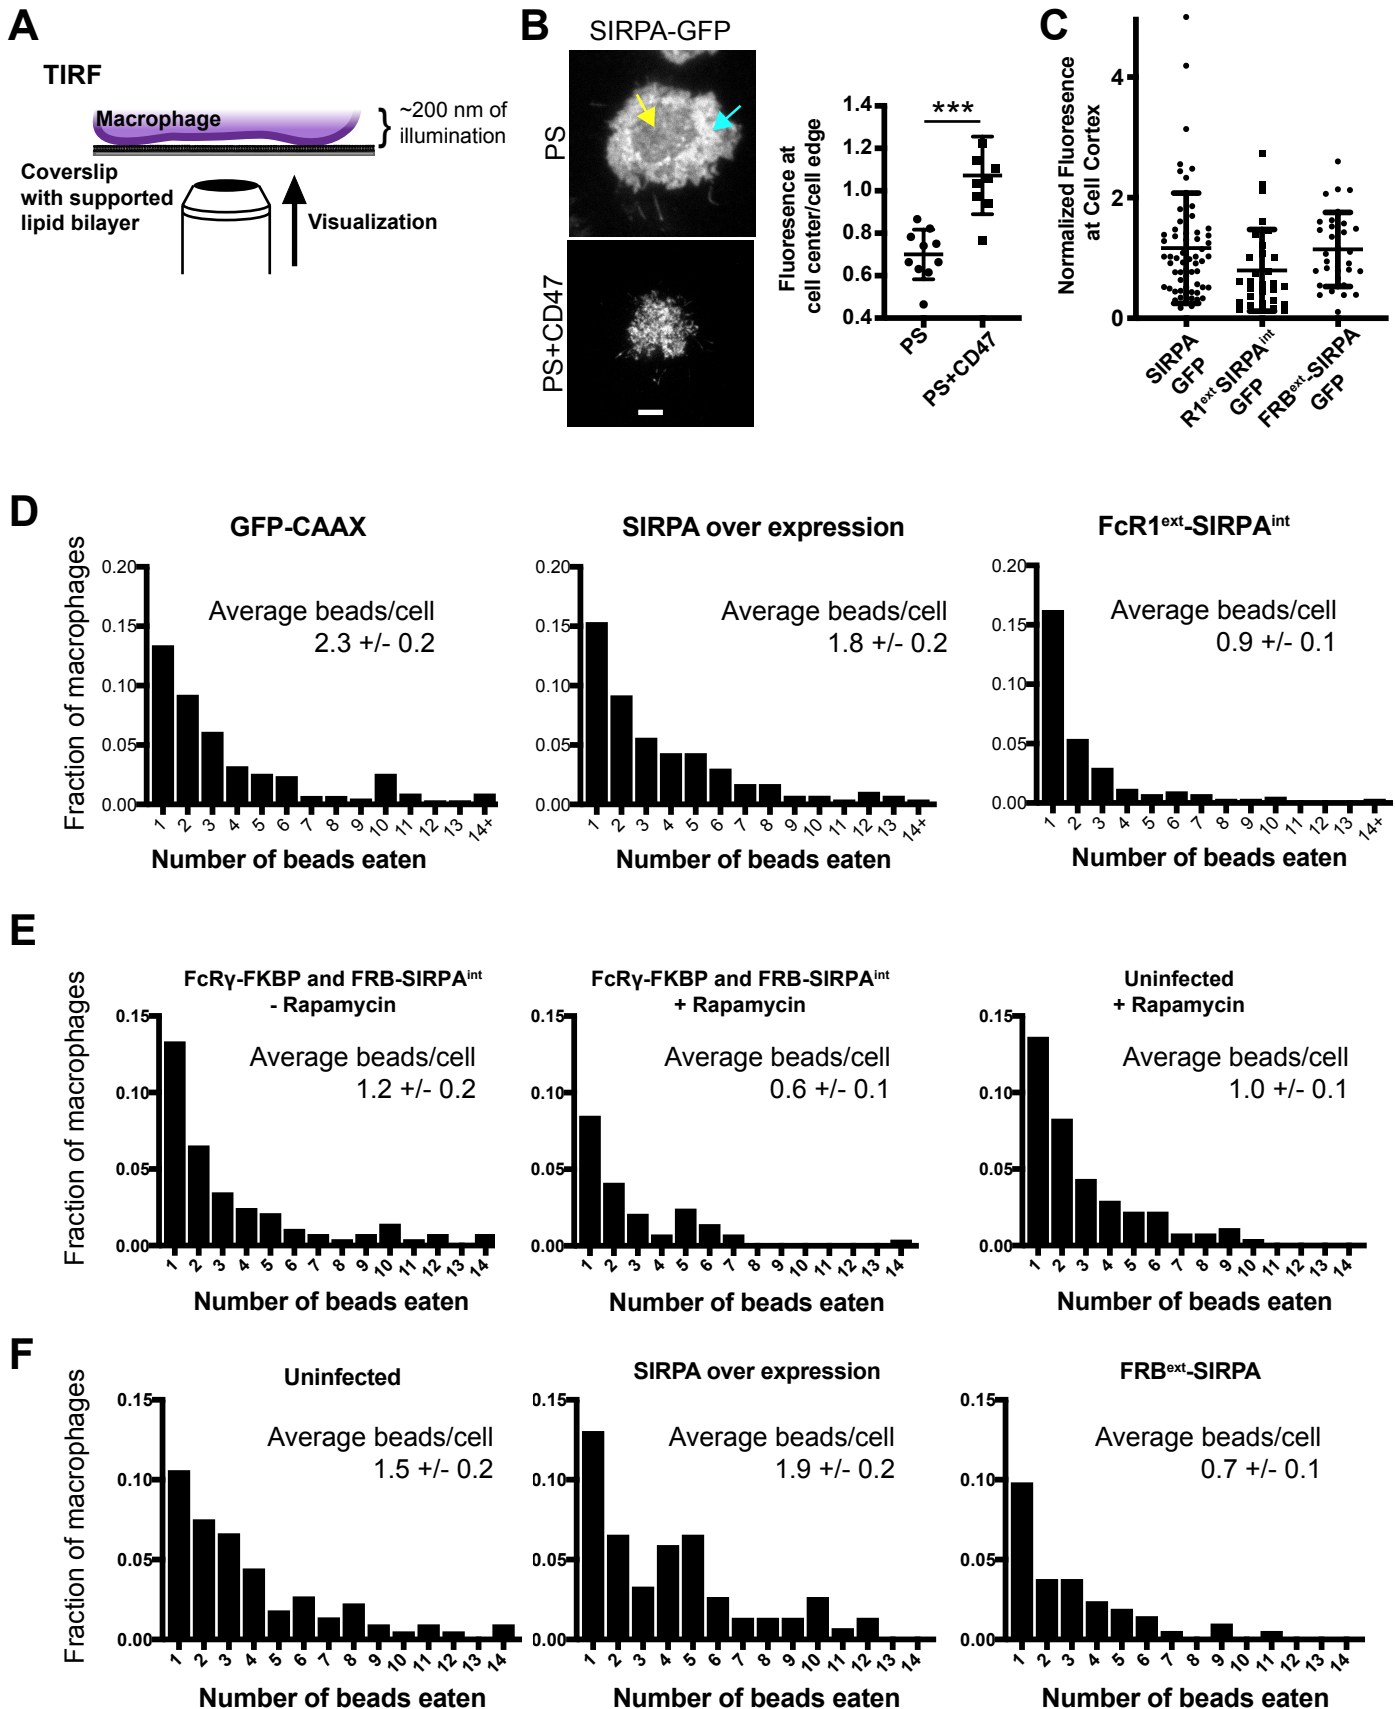

Supplement: Supplementary file [file media-5.pdf]
