# Supplementary material for: CD47 suppresses phagocytosis by repositioning SIRPA and preventing integrin activation
Source: bioRxiv or medRxiv preprint supplement (doi:10.1101/752311), 2019-08-30

# Figure S3, related to Figure 3: CD47 does not affect Fc Receptor activation

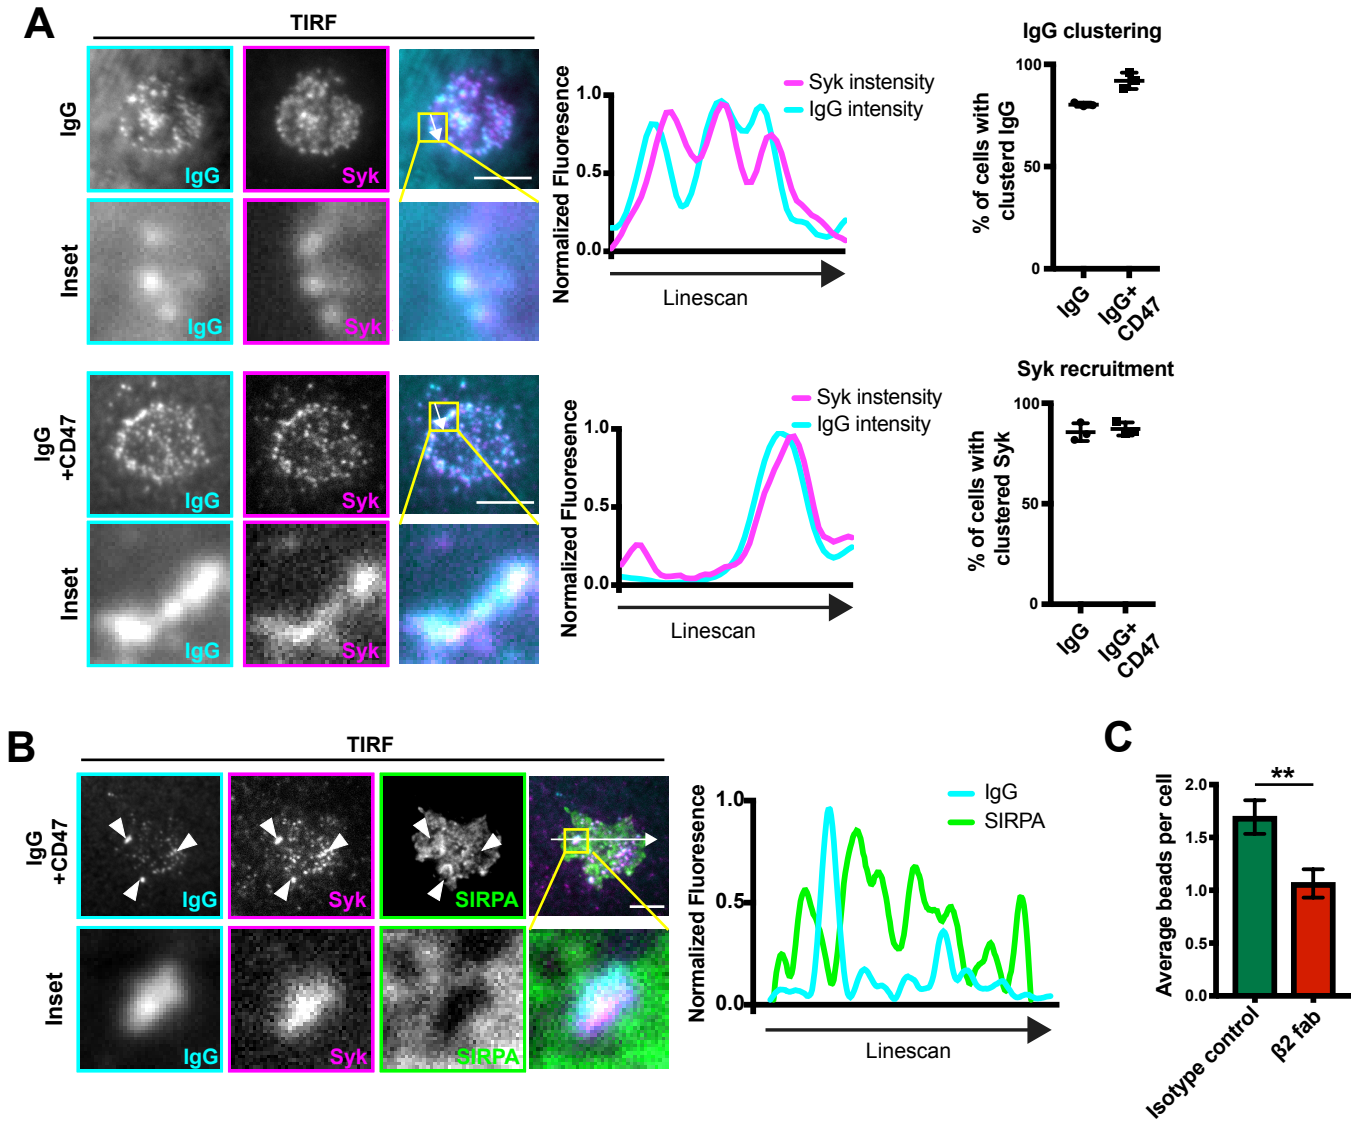

Supplement: Supplementary file [file media-6.pdf]
