# Supplementary material for: CD47 suppresses phagocytosis by repositioning SIRPA and preventing integrin activation
Source: bioRxiv or medRxiv preprint supplement (doi:10.1101/752311), 2019-08-30

**Figure S4, related to Figure 4: Manganese does not affect L1210 viability**

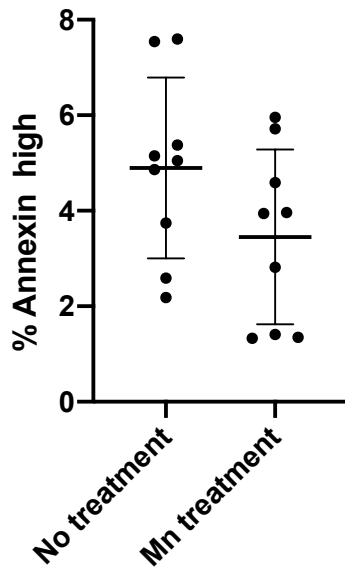

Supplement: Supplementary file [file media-7.pdf]
